# Supplementary material for: Place in Therapy of Cyclin-Dependent Kinase 4/6 Inhibitors in Breast Cancer: A Targeted Literature Review
Source: PubMed Central journal article supplement — Target Oncol. 2023 Apr 19;18(3):327–58. doi: 10.1007/s11523-023-00957-7 (PMC10191980; doi:10.1007/s11523-023-00957-7), 2023-04-19
Supplement: 11523_2023_957_MOESM1_ESM.pdf [file 11523_2023_957_MOESM1_ESM.pdf]

**Title: Place in Therapy of Cyclin-dependent Kinase 4/6 Inhibitors in Breast Cancer: A Targeted Literature Review**

**Supplementary Information**

**Target Journal: Targeted Oncology**

**Running Header:** Place in Therapy of CDK4/6i in Breast Cancer: A Targeted Literature Review

**Author names:** Melody Zhao<sup>1</sup>, Kent A. Hanson<sup>2,3</sup>, Yixie Zhang<sup>1</sup>, Anna Zhou<sup>1</sup>, Ashley S. Cha-Silva<sup>3</sup>

**Author affiliations (institution, department, city, country):**

<sup>1</sup>EVERSANA, Burlington, Ontario, Canada

<sup>2</sup>University of Illinois Chicago, Pharmacy Systems, Outcomes and Policy, Chicago, IL, United States

<sup>3</sup>Pfizer, New York, NY 10017, USA

**Corresponding author name and email:** Melody Zhao (melody.zhao@eversana.com)

**ORCID numbers:**

Melody Zhao: 0000-0002-3891-5367

Kent Hanson: 0000-0002-7201-3324

Yixie Zhang: 0000-0002-5346-7662

Anna Zhou: 0000-0001-5451-4670

Ashley Cha-Silva: 0000-0002-8484-6251

## Figure Legends

### Fig. 1 PRISMA Study Selection Flow Diagram

Abbreviations: EudraCT = European Union Drug Regulating Authorities Clinical Trials Database; WHO = World Health Organization. Source: Adapted from The PRISMA 2020 statement.

### Fig. 2 Median Progression-free Survival on CDK4/6i Treatments in 1L

Median PFS for CDK4/6i treatment are presented in the 1L setting. Each included patient population is presented along X-axis with a unique reference number. The size of each bubble represents sample size. Complete list of included studies and reported PFS are presented in **Table 3**.

Abbreviations: CDK4/6i = cyclin-dependent kinase 4/6 inhibitor; PFS = progression-free survival (months); Ref # = reference number.

### Fig. 3 Median Progression-free Survival on CDK4/6i Treatments in 1L+ to 2L

Median PFS for CDK4/6i treatment are presented in the 1L+ to 2L setting. Each included patient population is presented along X-axis with a unique reference number. The size of each bubble represents sample size. Data were further grouped and color-coded by the treatment received prior to CDK4/6i treatment. Complete list of included studies and reported PFS are presented in **Table 3**.

Abbreviations: #L = # of line of therapy; CDK4/6i = cyclin-dependent kinase 4/6 inhibitor; CT = chemotherapy; ET = endocrine therapy; NR = not reported; PFS = progression-free survival (months); Ref # = reference number.

### Fig. 4 Median Progression-free Survival on CDK4/6i Treatments in 2L+ to 3L

Median PFS for CDK4/6i treatment are presented in the 2L+ to 3L setting. Each included patient population is presented along X-axis with a unique reference number. The size of each bubble represents sample size. Data were further grouped and color-coded by the treatment received prior to CDK4/6i treatment. Complete list of included studies and reported PFS are presented in **Table 3**.

Abbreviations: #L = # of line of therapy; CDK4/6i = cyclin-dependent kinase 4/6 inhibitor; CT = chemotherapy; NR = not reported; PFS = progression-free survival (months); Ref # = reference number.

### Fig. 5 Median Progression-free Survival on CDK4/6i Treatments in 3L+

Median PFS for CDK4/6i treatment are presented in the 3L+ setting. Each included patient population is presented along X-axis with a unique reference number. The size of each bubble represents sample size. Data were further grouped and color-coded by the treatment received prior to CDK4/6i treatment. Complete list of included studies and reported PFS are presented in **Table 3**.

Abbreviations: #L = # of line of therapy; CDK4/6i = cyclin-dependent kinase 4/6 inhibitor; CT = chemotherapy; ET = endocrine therapy; NR = not reported; PFS = progression-free survival (months); Ref # = reference number.

### Fig. 6 Median Overall Survival on CDK4/6i Treatments in 1L

Median OS for CDK4/6i treatment is presented in the 1L setting. Each included patient population is presented along X-axis with a unique reference number. The size of each bubble represents sample size. Complete list of included studies and reported OS are presented in **Table 4**.

Abbreviations: #L = # of line of therapy; CDK4/6i = cyclin-dependent kinase 4/6 inhibitor; OS = overall survival (months); Ref # = reference number.

### **Fig. 7 Median Overall Survival on CDK4/6i Treatments in 1L+ to 2L**

Median OS for CDK4/6i treatment is presented in the 1L+ to 2L setting. Each included patient population is presented along X-axis with a unique reference number. The size of each bubble represents sample size. Data were further grouped and color-coded by the treatment received prior to CDK4/6i treatment. Complete list of included studies and reported OS are presented in **Table 4**.

Abbreviations: #L = # of line of therapy; CDK4/6i = cyclin-dependent kinase 4/6 inhibitor; ET = endocrine therapy; OS = overall survival (months); Ref # = reference number.

### **Fig. 8 Median Overall Survival on CDK4/6i Treatments in 2L+**

Median OS for CDK4/6i treatment is presented in the 2L+ setting. Each included patient population is presented along X-axis with a unique reference number. The size of each bubble represents sample size. Data were further grouped and color-coded by the treatment received prior to CDK4/6i treatment. Complete list of included studies and reported OS are presented in **Table 4**.

Abbreviations: #L = # of line of therapy; CDK4/6i = cyclin-dependent kinase 4/6 inhibitor; CT = chemotherapy; ET = endocrine therapy; OS = overall survival (months); Ref # = reference number.

### **Fig. 9 Median Survival on Post-CDK4/6i Treatments by Line of Therapy**

Median PFS (A) and median OS (B) of post-CDK4/6i treatments grouped by the therapy line in which subsequent therapy was received. Each subsequent treatment is presented along X-axis with a unique reference number. The size of each bubble represents sample size. Data were further grouped and color-coded by the subsequent treatment received. Complete lists of included studies and reported PFS and OS are presented in **Table 3** and **Table 4**, respectively.

Abbreviations: #L = # of line of therapy; CDK4/6i = cyclin-dependent kinase 4/6 inhibitor; CT = chemotherapy; ET = endocrine therapy; NR = not reported; OS = overall survival (months); PFS = progression-free survival (months); Ref # = reference number.

## Online Resource 1: Search Strategy and PRISMA

### Original Search

The Ovid MEDLINE databases (Ovid MEDLINE(R) Epub Ahead of Print, In-Process & Other Non-Indexed Citations and Daily) were searched on October 15<sup>th</sup>, 2021. The date range of the search was from 1946 to October 14<sup>th</sup>, 2021. The detailed search strategies used to search the Ovid MEDLINE databases are shown in the tables below. The search strategy for narrative and systematic reviews, including search terms and number of studies identified with each search term, are shown in **Table S1**. The search strategy and number of results for clinical studies are shown in **Table S2**. The last row in each table represents the final number of studies included for screening.

Clinical trial registries and Google Scholar were searched separately in October and November 2021 using the search strategies shown in **Table S3**. Clinical trial registry search results were limited to trials that started on or after January 1<sup>st</sup>, 2015 up to the search date (October 15<sup>th</sup>, 2021), and in patients aged 18 and older.

**Table S1: Reviews Search Strategy**

| #  | Searches                                                                                                                                                                                                                   | Results |
|----|----------------------------------------------------------------------------------------------------------------------------------------------------------------------------------------------------------------------------|---------|
| 1  | exp Breast Neoplasms/                                                                                                                                                                                                      | 313330  |
| 2  | exp Breast Carcinoma In Situ/                                                                                                                                                                                              | 10763   |
| 3  | ((breast* or mamma or mammaries or mammary) adj3 (adenocarcinoma* or adeno-carcinoma* or cancer* or carcinoma* or tumour* or tumor* or malignan* or neoplasm*)).tw,kw,kf.                                                  | 381488  |
| 4  | ((ductal or intraductal or intra-ductal) adj (carcinoma? or hyperplasia?)).tw,kw,kf.                                                                                                                                       | 17240   |
| 5  | (lobul* carcinoma? adj2 "in situ").tw,kw,kf.                                                                                                                                                                               | 1113    |
| 6  | (paget* and (areola? or breast* or mammaries or mammary or nipple?)).tw,kw,kf.                                                                                                                                             | 1396    |
| 7  | (DCIS or LCIS).tw,kw,kf.                                                                                                                                                                                                   | 5724    |
| 8  | or/1-7 [BREAST CANCER]                                                                                                                                                                                                     | 445598  |
| 9  | (abemaciclib* or bemaciclib* or "ly 2835210" or "ly 2835219" or ly2835210 or ly283521 or verzenio\$2 or verzenios\$2 or 1231929-97-7 or 60UAB198HK).tw,kw,kf,rn.                                                           | 443     |
| 10 | (lerociclib* or "g1t 38" or g1t38 or 1628256-23-4 or WBH8AY6ENB).tw,kw,kf,rn.                                                                                                                                              | 3       |
| 11 | (palbociclib* or ibrance\$2 or "pd 0332991" or "pd 332991" or pd332991 or "pf 00080665" or pf00080665 or 571190-30-2 or G9ZF61LE7G).tw,kw,kf,rn.                                                                           | 1318    |
| 12 | (ribociclib* or kisqali\$2 or "lee 011" or "lee 011a" or "lee 011bba" or "lee 11" or "lee 11a" or "lee 11bba" or lee011 or lee011a or lee011bba or lee11 or lee11a or lee11bba or 1211441-98-3 or TK8ERE8P56).tw,kw,kf,rn. | 501     |
| 13 | auceliciclib*.tw,kw,kf.                                                                                                                                                                                                    | 0       |
| 14 | "CS-3002".tw,kw,kf.                                                                                                                                                                                                        | 0       |
| 15 | ("ON-123300" or ON123300 or 1357470-29-1 or QJ8RO3296G).tw,kw,kf,rn.                                                                                                                                                       | 5       |
| 16 | "QHRD-110".tw,kw,kf.                                                                                                                                                                                                       | 0       |
| 17 | "TY-302".tw,kw,kf.                                                                                                                                                                                                         | 0       |
| 18 | "VS2-370".tw,kw,kf.                                                                                                                                                                                                        | 0       |
| 19 | Cyclin-Dependent Kinase 4/ai [antagonists & inhibitors]                                                                                                                                                                    | 777     |
| 20 | Cyclin-Dependent Kinase 6/ai [antagonists & inhibitors]                                                                                                                                                                    | 611     |
| 21 | ("CDK 4/6 inhibitor?" or "CDK4/6 inhibitor?" or "CDK 4/6i" or "CDK4/6i").tw,kw,kf.                                                                                                                                         | 1383    |
| 22 | ("cyclin dependent kinase 4/6" adj3 inhibitor?).tw,kw,kf.                                                                                                                                                                  | 252     |
| 23 | ((CDK4 or CDK-4 or CDK6 or CDK-6) adj3 inhibitor?).tw,kw,kf.                                                                                                                                                               | 1898    |

| #  | Searches                                                                                                                                                                                                                                                                                                                                             | Results |
|----|------------------------------------------------------------------------------------------------------------------------------------------------------------------------------------------------------------------------------------------------------------------------------------------------------------------------------------------------------|---------|
| 24 | (("cell division protein kinase 4" or "cell division protein kinase 6") adj3 inhibitor?).tw,kw,kf.                                                                                                                                                                                                                                                   | 0       |
| 25 | (("cyclin dependent kinase 4" or "cyclin dependent kinase 6") adj3 inhibitor?).tw,kw,kf.                                                                                                                                                                                                                                                             | 422     |
| 26 | or/9-25 [CDK 4/6i]                                                                                                                                                                                                                                                                                                                                   | 2972    |
| 27 | 8 and 26 [BREAST CANCER - CDK 4/6i]                                                                                                                                                                                                                                                                                                                  | 1523    |
| 28 | (exp Child/ or exp Infant/) not (exp Adults/ or Adolescent/)                                                                                                                                                                                                                                                                                         | 1340199 |
| 29 | 27 not 28 [CHILD-, INFANT-ONLY REMOVED]                                                                                                                                                                                                                                                                                                              | 1523    |
| 30 | exp Animals/ not Humans/                                                                                                                                                                                                                                                                                                                             | 4897921 |
| 31 | 29 not 30 [ANIMAL-ONLY REMOVED]                                                                                                                                                                                                                                                                                                                      | 1505    |
| 32 | (comment or editorial or news or newspaper article).pt.                                                                                                                                                                                                                                                                                              | 1542176 |
| 33 | (letter not (letter and randomized controlled trial)).pt.                                                                                                                                                                                                                                                                                            | 1149422 |
| 34 | 31 not (32 or 33) [OPINION PIECES REMOVED]                                                                                                                                                                                                                                                                                                           | 1388    |
| 35 | Systematic Review.pt.                                                                                                                                                                                                                                                                                                                                | 171192  |
| 36 | exp Systematic Reviews as Topic/                                                                                                                                                                                                                                                                                                                     | 6696    |
| 37 | Meta Analysis.pt.                                                                                                                                                                                                                                                                                                                                    | 143567  |
| 38 | exp Meta-Analysis as Topic/                                                                                                                                                                                                                                                                                                                          | 23141   |
| 39 | (meta-analy* or metanaly* or metaanaly* or met analy* or integrative research or integrative review* or integrative overview* or research integration or research overview* or collaborative review*).tw,kw,kf.                                                                                                                                      | 221466  |
| 40 | (systematic review* or systematic overview* or evidence-based review* or evidence-based overview* or (evidence adj3 (review* or overview*)) or meta-review* or meta-overview* or meta-synthes* or mapping review? or rapid review* or "review of reviews" or scoping review? or umbrella review? or technology assessment* or HTA or HTAs).tw,kw,kf. | 286091  |
| 41 | exp Technology Assessment, Biomedical/                                                                                                                                                                                                                                                                                                               | 11570   |
| 42 | (cochrane or health technology assessment or evidence report or systematic reviews).jw.                                                                                                                                                                                                                                                              | 20900   |
| 43 | (network adj (MA or MAs)).tw,kw,kf.                                                                                                                                                                                                                                                                                                                  | 15      |
| 44 | (NMA or NMAs or MTC or MTCs or MAIC or MAICs).tw,kw,kf.                                                                                                                                                                                                                                                                                              | 8039    |
| 45 | indirect* compar*.tw,kw,kf.                                                                                                                                                                                                                                                                                                                          | 2318    |
| 46 | (indirect treatment* adj1 compar*).tw,kw,kf.                                                                                                                                                                                                                                                                                                         | 352     |
| 47 | (mixed treatment* adj1 compar*).tw,kw,kf.                                                                                                                                                                                                                                                                                                            | 504     |
| 48 | (multiple treatment* adj1 compar*).tw,kw,kf.                                                                                                                                                                                                                                                                                                         | 205     |
| 49 | (multi-treatment* adj1 compar*).tw,kw,kf.                                                                                                                                                                                                                                                                                                            | 1       |
| 50 | simultaneous* compar*.tw,kw,kf.                                                                                                                                                                                                                                                                                                                      | 1175    |
| 51 | mixed comparison?.tw,kw,kf.                                                                                                                                                                                                                                                                                                                          | 38      |
| 52 | review.pt.                                                                                                                                                                                                                                                                                                                                           | 2874873 |
| 53 | narrative review?.tw,kw,kf.                                                                                                                                                                                                                                                                                                                          | 16786   |
| 54 | or/35-53 [REVIEWS]                                                                                                                                                                                                                                                                                                                                   | 3118122 |
| 55 | 34 and 54 [BREAST CANCER - CDK 4/6i - REVIEWS]                                                                                                                                                                                                                                                                                                       | 445     |
| 56 | limit 55 to yr="2018-current"                                                                                                                                                                                                                                                                                                                        | 310     |

**Table S2: Clinical Studies Search Strategy**

| # | Searches                                                                                                                                                                | Results |
|---|-------------------------------------------------------------------------------------------------------------------------------------------------------------------------|---------|
| 1 | exp Breast Neoplasms/                                                                                                                                                   | 313330  |
| 2 | exp Breast Carcinoma In Situ/                                                                                                                                           | 10763   |
| 3 | ((breast* or mamma or mammary or mammary) adj3 (adenocarcinoma* or adeno-carcinoma* or cancer* or carcinoma* or tumour* or tumor* or malignan* or neoplasm*)).tw,kw,kf. | 381488  |
| 4 | ((ductal or intraductal or intra-ductal) adj (carcinoma? or hyperplasia?)).tw,kw,kf.                                                                                    | 17240   |
| 5 | (lobul* carcinoma? adj2 "in situ").tw,kw,kf.                                                                                                                            | 1113    |

| #  | Searches                                                                                                                                                                                                                   | Results |
|----|----------------------------------------------------------------------------------------------------------------------------------------------------------------------------------------------------------------------------|---------|
| 6  | (paget* and (areola? or breast* or mammaries or mammary or nipple?)).tw,kw,kf.                                                                                                                                             | 1396    |
| 7  | (DCIS or LCIS).tw,kw,kf.                                                                                                                                                                                                   | 5724    |
| 8  | or/1-7 [BREAST CANCER]                                                                                                                                                                                                     | 445598  |
| 9  | (abemaciclib* or bemaciclib* or "ly 2835210" or "ly 2835219" or ly2835210 or ly283521 or verzenio\$2 or verzenios\$2 or 1231929-97-7 or 60UAB198HK).tw,kw,kf,fn.                                                           | 443     |
| 10 | (lerociclib* or "g1t 38" or g1t38 or 1628256-23-4 or WBH8AY6ENB).tw,kw,kf,fn.                                                                                                                                              | 3       |
| 11 | (palbociclib* or ibrance\$2 or "pd 0332991" or "pd 332991" or pd332991 or "pf 00080665" or pf00080665 or 571190-30-2 or G9ZF61LE7G).tw,kw,kf,fn.                                                                           | 1318    |
| 12 | (ribociclib* or kisqali\$2 or "lee 011" or "lee 011a" or "lee 011bba" or "lee 11" or "lee 11a" or "lee 11bba" or lee011 or lee011a or lee011bba or lee11 or lee11a or lee11bba or 1211441-98-3 or TK8ERE8P56).tw,kw,kf,fn. | 501     |
| 13 | auceliciclib*.tw,kw,kf.                                                                                                                                                                                                    | 0       |
| 14 | "CS-3002".tw,kw,kf.                                                                                                                                                                                                        | 0       |
| 15 | ("ON-123300" or ON123300 or 1357470-29-1 or QJ8RO3296G).tw,kw,kf,fn.                                                                                                                                                       | 5       |
| 16 | "QHRD-110".tw,kw,kf.                                                                                                                                                                                                       | 0       |
| 17 | "TY-302".tw,kw,kf.                                                                                                                                                                                                         | 0       |
| 18 | "VS2-370".tw,kw,kf.                                                                                                                                                                                                        | 0       |
| 19 | Cyclin-Dependent Kinase 4/ai [antagonists & inhibitors]                                                                                                                                                                    | 777     |
| 20 | Cyclin-Dependent Kinase 6/ai [antagonists & inhibitors]                                                                                                                                                                    | 611     |
| 21 | ("CDK 4/6 inhibitor?" or "CDK4/6 inhibitor?" or "CDK 4/6i" or "CDK4/6i").tw,kw,kf.                                                                                                                                         | 1383    |
| 22 | ("cyclin dependent kinase 4/6" adj3 inhibitor?).tw,kw,kf.                                                                                                                                                                  | 252     |
| 23 | ((CDK4 or CDK-4 or CDK6 or CDK-6) adj3 inhibitor?).tw,kw,kf.                                                                                                                                                               | 1898    |
| 24 | ("cell division protein kinase 4" or "cell division protein kinase 6") adj3 inhibitor?).tw,kw,kf.                                                                                                                          | 0       |
| 25 | ("cyclin dependent kinase 4" or "cyclin dependent kinase 6") adj3 inhibitor?).tw,kw,kf.                                                                                                                                    | 422     |
| 26 | or/9-25 [CDK 4/6i]                                                                                                                                                                                                         | 2972    |
| 27 | 8 and 26 [BREAST CANCER - CDK 4/6i]                                                                                                                                                                                        | 1523    |
| 28 | (exp Child/ or exp Infant/) not (exp Adults/ or Adolescent/)                                                                                                                                                               | 1340199 |
| 29 | 27 not 28 [CHILD-, INFANT-ONLY REMOVED]                                                                                                                                                                                    | 1523    |
| 30 | exp Animals/ not Humans/                                                                                                                                                                                                   | 4897921 |
| 31 | 29 not 30 [ANIMAL-ONLY REMOVED]                                                                                                                                                                                            | 1505    |
| 32 | (comment or editorial or news or newspaper article).pt.                                                                                                                                                                    | 1542176 |
| 33 | (letter not (letter and randomized controlled trial)).pt.                                                                                                                                                                  | 1149422 |
| 34 | 31 not (32 or 33) [OPINION PIECES REMOVED]                                                                                                                                                                                 | 1388    |
| 35 | clinical trials as topic.sh.                                                                                                                                                                                               | 197738  |
| 36 | (randomized controlled trial or controlled clinical trial).pt.                                                                                                                                                             | 635770  |
| 37 | (randomized or randomly or placebo or trial or groups).ab.                                                                                                                                                                 | 3105949 |
| 38 | drug therapy.fs.                                                                                                                                                                                                           | 2385661 |
| 39 | or/35-38 [RANDOMIZED STUDIES – MEDLINE, sensitivity-maximizing version – Cochrane Handbook, 2019]                                                                                                                          | 5213278 |
| 40 | (pragmatic clinical trial or equivalence trial).pt.                                                                                                                                                                        | 2784    |
| 41 | exp "Controlled Clinical Trials as Topic"/                                                                                                                                                                                 | 158253  |
| 42 | (randomi#ed or randomi#ation? or randomly or RCT or placebo*).tw,kw,kf.                                                                                                                                                    | 1084682 |
| 43 | ((singl* or doubl* or trebl* or tripl*) adj (mask* or blind* or dumm*)).tw,kw,kf.                                                                                                                                          | 183817  |
| 44 | or/40-43 [ADDITIONAL TERMS TO SUPPLEMENT COCHRANE HSSS]                                                                                                                                                                    | 1165984 |
| 45 | 39 or 44 [RCT FILTER]                                                                                                                                                                                                      | 5292748 |
| 46 | 34 and 45 [RCTS]                                                                                                                                                                                                           | 860     |
| 47 | controlled clinical trial.pt.                                                                                                                                                                                              | 94453   |
| 48 | Controlled Clinical Trial/ or Controlled Clinical Trials as Topic/                                                                                                                                                         | 100016  |
| 49 | (control* adj2 trial).tw,kw,kf.                                                                                                                                                                                            | 181270  |
| 50 | Non-Randomized Controlled Trials as Topic/                                                                                                                                                                                 | 989     |
| 51 | (nonrandom* or non-random* or quasi-random* or quasi-experiment*).tw,kw,kf.                                                                                                                                                | 63502   |
| 52 | (nRCT or non-RCT).tw,kw,kf.                                                                                                                                                                                                | 393     |
| 53 | Controlled Before-After Studies/                                                                                                                                                                                           | 657     |
| 54 | (control* adj3 ("before and after" or "before after")).tw,kw,kf.                                                                                                                                                           | 4737    |
| 55 | Interrupted Time Series Analysis/                                                                                                                                                                                          | 1410    |
| 56 | time series.tw,kw,kf.                                                                                                                                                                                                      | 37099   |
| 57 | (pre- adj5 post-).tw,kw,kf.                                                                                                                                                                                                | 109608  |
| 58 | (pretest adj5 posttest).tw,kw,kf.                                                                                                                                                                                          | 6690    |

| #  | Searches                                                                                                                                | Results |
|----|-----------------------------------------------------------------------------------------------------------------------------------------|---------|
| 59 | (pre-test adj5 post-test).tw,kw,kf.                                                                                                     | 3184    |
| 60 | Historically Controlled Study/                                                                                                          | 212     |
| 61 | (control* adj2 study).tw,kw,kf.                                                                                                         | 189344  |
| 62 | Control Groups/                                                                                                                         | 1775    |
| 63 | (control* adj2 group?).tw,kw,kf.                                                                                                        | 553159  |
| 64 | trial.ti.                                                                                                                               | 249218  |
| 65 | or/47-64 [nRCT FILTER]                                                                                                                  | 1228795 |
| 66 | 34 and 65 [nRCTs]                                                                                                                       | 72      |
| 67 | exp Cohort Studies/                                                                                                                     | 2224003 |
| 68 | cohort?.tw,kw,kf.                                                                                                                       | 701175  |
| 69 | Retrospective Studies/                                                                                                                  | 950998  |
| 70 | (longitudinal or prospective or retrospective).tw,kw,kf.                                                                                | 1445649 |
| 71 | ((followup or follow-up) adj (study or studies)).tw,kw,kf.                                                                              | 54616   |
| 72 | Observational study.pt.                                                                                                                 | 110855  |
| 73 | (observation\$2 adj (study or studies)).tw,kw,kf.                                                                                       | 131989  |
| 74 | ((population or population-based) adj (study or studies or analys#s)).tw,kw,kf.                                                         | 25870   |
| 75 | ((multidimensional or multi-dimensional) adj (study or studies)).tw,kw,kf.                                                              | 126     |
| 76 | Comparative Study.pt.                                                                                                                   | 1900598 |
| 77 | ((comparative or comparison) adj (study or studies)).tw,kw,kf.                                                                          | 122813  |
| 78 | exp Case-Control Studies/                                                                                                               | 1233904 |
| 79 | ((case-control* or case-based or case-comparison or case-compeer or case-referrent or case-referent) adj3 (study or studies)).tw,kw,kf. | 126292  |
| 80 | Cross-Sectional Studies/                                                                                                                | 391086  |
| 81 | (crosssection* or cross-section*).tw,kw,kf.                                                                                             | 460162  |
| 82 | or/67-81 [OBSERVATIONAL STUDY FILTER]                                                                                                   | 5250955 |
| 83 | 34 and 82 [OBSERVATIONAL STUDIES]                                                                                                       | 233     |
| 84 | "Clinical Trial, Phase II"/                                                                                                             | 35987   |
| 85 | ((phase 2 or phase II) adj2 (study or studies or trial? or design?)).tw,kw,kf.                                                          | 43798   |
| 86 | ("single arm" adj2 (study or studies or trial? or design?)).tw,kw,kf.                                                                   | 4866    |
| 87 | or/84-86 [SINGLE-ARM STUDY FILTER]                                                                                                      | 63264   |
| 88 | 34 and 87 [SINGLE-ARM STUDIES]                                                                                                          | 75      |
| 89 | (real world or RWE or pragmatic design? or pragmatic stud\$3 or pragmatic trial?).tw,kw,kf.                                             | 57199   |
| 90 | 34 and 89 [RWE]                                                                                                                         | 73      |
| 91 | 46 or 66 or 83 or 88 or 90 [ALL STUDIES]                                                                                                | 940     |
| 92 | limit 91 to yr="2015-current"                                                                                                           | 913     |

**Table S3: Grey Literature Search Strategy**

| Database                      | Search Terms/Strategy                                     | Results         |
|-------------------------------|-----------------------------------------------------------|-----------------|
| Clinicaltrials.gov            | Breast cancer and CDK4/6                                  | 98              |
|                               | Breast cancer and treatment pattern                       | 107             |
| WHO                           | Breast cancer and CDK4/6                                  | 84              |
|                               | Breast cancer and treatment pattern                       | 36              |
| EudraCT                       | Breast cancer and CDK4/6                                  | 39              |
|                               | Breast cancer and treatment pattern                       | 11              |
| Google Scholar                | Breast cancer and CDK4/6 inhibitor and treatment sequence | 50 <sup>a</sup> |
|                               | CDK4/6 and treatment pattern                              | 50 <sup>a</sup> |
|                               | CDK4/6 and treatment sequence                             | 50 <sup>a</sup> |
|                               | Breast cancer and treatment pattern                       | 50 <sup>a</sup> |
| Narrative Review Bibliography | Studies relevant to treatment patterns                    | 20              |

<sup>a</sup> Top 50 hits in each independent search were reviewed.

**Figure A.1: PRISMA Study Selection Flow Diagram of Original Search**

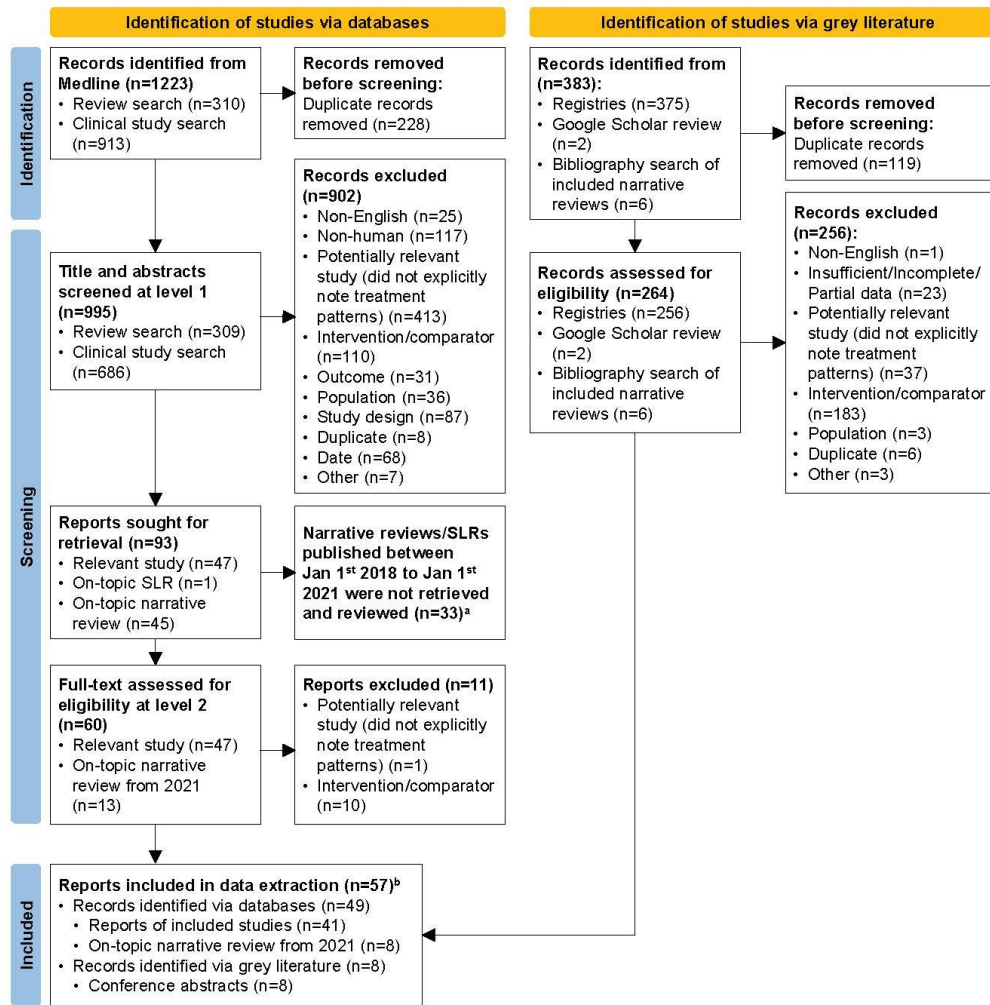

<sup>a</sup> Screening was further limited to Jan 1st, 2021, due to the large number of reviews identified.

<sup>b</sup> 57 records representing 53 unique studies (8 narrative reviews and 45 clinical studies).



## Updated Search

An updated search for reviews and clinical studies combined was conducted in the Ovid MEDLINE databases (Ovid MEDLINE(R) Epub Ahead of Print, In-Process & Other Non-Indexed Citations and Daily) on October 19<sup>th</sup>, 2022. The date range of the search was from 1946 to October 18<sup>th</sup>, 2022. The detailed search strategy used to search the Ovid MEDLINE databases are shown in the tables below. The search strategy for narrative and systematic reviews, including search terms and number of studies identified with each search term, are shown in **Table S4**. The last row in each table represents the final number of studies included for screening.

Clinical trial registries and Google Scholar were searched separately in October and November 2022 using the search strategies shown in **Table S5** Table S3. Clinical trial registry search results were limited to trials that started on or after January 1<sup>st</sup>, 2015 up to the search dates, and in patients aged 18 and older.

**Table S4: Updated Reviews and Clinical Studies Search Strategy**

| #  | Searches                                                                                                                                                                                                                   | Results |
|----|----------------------------------------------------------------------------------------------------------------------------------------------------------------------------------------------------------------------------|---------|
| 1  | exp Breast Neoplasms/                                                                                                                                                                                                      | 332485  |
| 2  | exp Breast Carcinoma In Situ/                                                                                                                                                                                              | 11184   |
| 3  | ((breast* or mamma or mammaries or mammary) adj3 (adenocarcinoma* or adeno-carcinoma* or cancer* or carcinoma* or tumour* or tumor* or malignan* or neoplasm*)).tw,kw,kf.                                                  | 405813  |
| 4  | ((ductal or intraductal or intra-ductal) adj (carcinoma? or hyperplasia?)).tw,kw,kf.                                                                                                                                       | 18149   |
| 5  | (lobul* carcinoma? adj2 "in situ").tw,kw,kf.                                                                                                                                                                               | 1151    |
| 6  | (paget* and (areola? or breast* or mammaries or mammary or nipple?)).tw,kw,kf.                                                                                                                                             | 1458    |
| 7  | (DCIS or LCIS).tw,kw,kf.                                                                                                                                                                                                   | 6034    |
| 8  | or/1-7 [BREAST CANCER]                                                                                                                                                                                                     | 471688  |
| 9  | (abemaciclib* or bemaciclib* or "ly 2835210" or "ly 2835219" or ly2835210 or ly283521 or verzenio\$2 or verzenios\$2 or 1231929-97-7 or 60UAB198HK).tw,kw,kf,rn.                                                           | 607     |
| 10 | (lerociclib* or "g1t 38" or g1t38 or 1628256-23-4 or WBH8AY6ENB).tw,kw,kf,rn.                                                                                                                                              | 3       |
| 11 | (palbociclib* or ibrance\$2 or "pd 0332991" or "pd 332991" or pd332991 or "pf 00080665" or pf00080665 or 571190-30-2 or G9ZF61LE7G).tw,kw,kf,rn.                                                                           | 1610    |
| 12 | (ribociclib* or kisqali\$2 or "lee 011" or "lee 011a" or "lee 011bba" or "lee 11" or "lee 11a" or "lee 11bba" or lee011 or lee011a or lee011bba or lee11 or lee11a or lee11bba or 1211441-98-3 or TK8ERE8P56).tw,kw,kf,rn. | 622     |
| 13 | auceliciclib*.tw,kw,kf.                                                                                                                                                                                                    | 0       |
| 14 | "CS-3002".tw,kw,kf.                                                                                                                                                                                                        | 0       |
| 15 | ("ON-123300" or ON123300 or 1357470-29-1 or QJ8RO3296G).tw,kw,kf,rn.                                                                                                                                                       | 6       |
| 16 | "QHRD-110".tw,kw,kf.                                                                                                                                                                                                       | 0       |
| 17 | "TY-302".tw,kw,kf.                                                                                                                                                                                                         | 0       |
| 18 | "VS2-370".tw,kw,kf.                                                                                                                                                                                                        | 0       |
| 19 | Cyclin-Dependent Kinase 4/ai [antagonists & inhibitors]                                                                                                                                                                    | 887     |
| 20 | Cyclin-Dependent Kinase 6/ai [antagonists & inhibitors]                                                                                                                                                                    | 719     |
| 21 | ("CDK 4/6 inhibitor?" or "CDK4/6 inhibitor?" or "CDK 4/6i" or "CDK4/6i").tw,kw,kf.                                                                                                                                         | 1741    |
| 22 | ("cyclin dependent kinase 4/6" adj3 inhibitor?).tw,kw,kf.                                                                                                                                                                  | 353     |
| 23 | ((CDK4 or CDK-4 or CDK6 or CDK-6) adj3 inhibitor?).tw,kw,kf.                                                                                                                                                               | 2296    |
| 24 | ("cell division protein kinase 4" or "cell division protein kinase 6") adj3 inhibitor?).tw,kw,kf.                                                                                                                          | 0       |
| 25 | ("cyclin dependent kinase 4" or "cyclin dependent kinase 6") adj3 inhibitor?).tw,kw,kf.                                                                                                                                    | 535     |
| 26 | or/9-25 [CDK 4/6i]                                                                                                                                                                                                         | 3643    |
| 27 | 8 and 26 [BREAST CANCER - CDK 4/6i]                                                                                                                                                                                        | 1974    |
| 28 | (exp Child/ or exp Infant/) not (exp Adults/ or Adolescent/)                                                                                                                                                               | 1413635 |

| #  | Searches                                                                                          | Results |
|----|---------------------------------------------------------------------------------------------------|---------|
| 29 | 27 not 28 [CHILD-, INFANT-ONLY REMOVED]                                                           | 1974    |
| 30 | exp Animals/ not Humans/                                                                          | 5056817 |
| 31 | 29 not 30 [ANIMAL-ONLY REMOVED]                                                                   | 1952    |
| 32 | (comment or editorial or news or newspaper article).pt.                                           | 1624173 |
| 33 | (letter not (letter and randomized controlled trial)).pt.                                         | 1190648 |
| 34 | 31 not (32 or 33) [OPINION PIECES REMOVED]                                                        | 1818    |
| 35 | clinical trials as topic.sh.                                                                      | 200473  |
| 36 | (randomized controlled trial or controlled clinical trial).pt.                                    | 669336  |
| 37 | (randomized or randomly or placebo or trial or groups).ab.                                        | 3332573 |
| 38 | drug therapy.fs.                                                                                  | 2539917 |
| 39 | or/35-38 [RANDOMIZED STUDIES – MEDLINE, sensitivity-maximizing version – Cochrane Handbook, 2019] | 5559716 |
| 40 | (pragmatic clinical trial or equivalence trial).pt.                                               | 3175    |
| 41 | exp "Controlled Clinical Trials as Topic"/                                                        | 167839  |
| 42 | (randomi#ed or randomi#ation? or randomly or RCT or placebo*).tw,kw,kf.                           | 1163500 |
| 43 | ((singl* or doubl* or trebl* or tripl*) adj (mask* or blind* or dumm*)).tw,kw,kf.                 | 192377  |
| 44 | or/40-43 [ADDITIONAL TERMS TO SUPPLEMENT COCHRANE HSSS]                                           | 1246151 |
| 45 | 39 or 44 [RCT FILTER]                                                                             | 5644204 |
| 46 | 34 and 45 [RCTS]                                                                                  | 1219    |
| 47 | controlled clinical trial.pt.                                                                     | 95077   |
| 48 | Controlled Clinical Trial/ or Controlled Clinical Trials as Topic/                                | 100674  |
| 49 | (control* adj2 trial).tw,kw,kf.                                                                   | 199342  |
| 50 | Non-Randomized Controlled Trials as Topic/                                                        | 1049    |
| 51 | (nonrandom* or non-random* or quasi-random* or quasi-experiment*).tw,kw,kf.                       | 69127   |
| 52 | (nRCT or non-RCT).tw,kw,kf.                                                                       | 461     |
| 53 | Controlled Before-After Studies/                                                                  | 703     |
| 54 | (control* adj3 ("before and after" or "before after")).tw,kw,kf.                                  | 5072    |
| 55 | Interrupted Time Series Analysis/                                                                 | 1703    |
| 56 | time series.tw,kw,kf.                                                                             | 42270   |
| 57 | (pre- adj5 post-).tw,kw,kf.                                                                       | 121591  |
| 58 | (pretest adj5 posttest).tw,kw,kf.                                                                 | 7301    |
| 59 | (pre-test adj5 post-test).tw,kw,kf.                                                               | 3633    |
| 60 | Historically Controlled Study/                                                                    | 222     |
| 61 | (control* adj2 study).tw,kw,kf.                                                                   | 201960  |
| 62 | Control Groups/                                                                                   | 1863    |
| 63 | (control* adj2 group?).tw,kw,kf.                                                                  | 595060  |
| 64 | trial.ti.                                                                                         | 272253  |
| 65 | or/47-64 [nRCT FILTER]                                                                            | 1321239 |
| 66 | 34 and 65 [nRCTs]                                                                                 | 112     |
| 67 | exp Cohort Studies/                                                                               | 2406952 |
| 68 | cohort?.tw,kw,kf.                                                                                 | 794631  |
| 69 | Retrospective Studies/                                                                            | 1067110 |
| 70 | (longitudinal or prospective or retrospective).tw,kw,kf.                                          | 1586454 |
| 71 | ((followup or follow-up) adj (study or studies)).tw,kw,kf.                                        | 57271   |
| 72 | Observational study.pt.                                                                           | 133610  |
| 73 | (observation\$2 adj (study or studies)).tw,kw,kf.                                                 | 150977  |
| 74 | ((population or population-based) adj (study or studies or analys#s)).tw,kw,kf.                   | 26999   |
| 75 | ((multidimensional or multi-dimensional) adj (study or studies)).tw,kw,kf.                        | 144     |
| 76 | Comparative Study.pt.                                                                             | 1911693 |
| 77 | ((comparative or comparison) adj (study or studies)).tw,kw,kf.                                    | 129700  |

| #   | Searches                                                                                                                                                                                                                                                                                       | Results |
|-----|------------------------------------------------------------------------------------------------------------------------------------------------------------------------------------------------------------------------------------------------------------------------------------------------|---------|
| 78  | exp Case-Control Studies/                                                                                                                                                                                                                                                                      | 1362410 |
| 79  | ((case-control* or case-based or case-comparison or case-compeer or case-referrent or case-referent) adj3 (study or studies)).tw,kw,kf.                                                                                                                                                        | 135328  |
| 80  | Cross-Sectional Studies/                                                                                                                                                                                                                                                                       | 443455  |
| 81  | (crosssection* or cross-section*).tw,kw,kf.                                                                                                                                                                                                                                                    | 518461  |
| 82  | or/67-81 [OBSERVATIONAL STUDY FILTER]                                                                                                                                                                                                                                                          | 5564360 |
| 83  | 34 and 82 [OBSERVATIONAL STUDIES]                                                                                                                                                                                                                                                              | 338     |
| 84  | "Clinical Trial, Phase II"/                                                                                                                                                                                                                                                                    | 38758   |
| 85  | ((phase 2 or phase II) adj2 (study or studies or trial? or design?)).tw,kw,kf.                                                                                                                                                                                                                 | 46316   |
| 86  | ("single arm" adj2 (study or studies or trial? or design?)).tw,kw,kf.                                                                                                                                                                                                                          | 5848    |
| 87  | or/84-86 [SINGLE-ARM STUDY FILTER]                                                                                                                                                                                                                                                             | 67765   |
| 88  | 34 and 87 [SINGLE-ARM STUDIES]                                                                                                                                                                                                                                                                 | 98      |
| 89  | (real world or RWE or pragmatic design? or pragmatic stud\$3 or pragmatic trial?).tw,kw,kf.                                                                                                                                                                                                    | 71029   |
| 90  | 34 and 89 [RWE]                                                                                                                                                                                                                                                                                | 133     |
| 91  | 46 or 66 or 83 or 88 or 90 [ALL STUDIES]                                                                                                                                                                                                                                                       | 1310    |
| 92  | limit 91 to yr="2015-current"                                                                                                                                                                                                                                                                  | 1283    |
| 93  | 92 and ((202110* not ("20211001" or "20211002" or "20211003" or "20211004" or 20211005 20211006 or "20211007" or "20211008" or "20211009" or "20211010" or "20211011" or "20211012" or "20211013" or "20211014")) or 202111* or 202112* or 2022*).dt. [Update results - 14 Oct 2021 - Current] | 294     |
| 94  | exp Breast Neoplasms/                                                                                                                                                                                                                                                                          | 332485  |
| 95  | exp Breast Carcinoma In Situ/                                                                                                                                                                                                                                                                  | 11184   |
| 96  | ((breast* or mamma or mammary) adj3 (adenocarcinoma* or adeno-carcinoma* or cancer* or carcinoma* or tumour* or tumor* or malignan* or neoplasm*)).tw,kw,kf.                                                                                                                                   | 405813  |
| 97  | ((ductal or intraductal or intra-ductal) adj (carcinoma? or hyperplasia?)).tw,kw,kf.                                                                                                                                                                                                           | 18149   |
| 98  | (lobul* carcinoma? adj2 "in situ").tw,kw,kf.                                                                                                                                                                                                                                                   | 1151    |
| 99  | (paget* and (areola? or breast* or mammary or nipple?)).tw,kw,kf.                                                                                                                                                                                                                              | 1458    |
| 100 | (DCIS or LCIS).tw,kw,kf.                                                                                                                                                                                                                                                                       | 6034    |
| 101 | or/94-100 [BREAST CANCER]                                                                                                                                                                                                                                                                      | 471688  |
| 102 | (abemaciclib* or bemaciclib* or "ly 2835210" or "ly 2835219" or ly2835210 or ly283521 or verzenio\$2 or verzenios\$2 or 1231929-97-7 or 60UAB198HK).tw,kw,kf,fn.                                                                                                                               | 607     |
| 103 | (lerociclib* or "g1t 38" or g1t38 or 1628256-23-4 or WBH8AY6ENB).tw,kw,kf,fn.                                                                                                                                                                                                                  | 3       |
| 104 | (palbociclib* or ibrance\$2 or "pd 0332991" or "pd 332991" or pd332991 or "pf 00080665" or pf00080665 or 571190-30-2 or G9ZF61LE7G).tw,kw,kf,fn.                                                                                                                                               | 1610    |
| 105 | (ribociclib* or kisqali\$2 or "lee 011" or "lee 011a" or "lee 011bba" or "lee 11" or "lee 11a" or "lee 11bba" or lee011 or lee011a or lee011bba or lee11 or lee11a or lee11bba or 1211441-98-3 or TK8ERE8P56).tw,kw,kf,fn.                                                                     | 622     |
| 106 | auceliciclib*.tw,kw,kf.                                                                                                                                                                                                                                                                        | 0       |
| 107 | "CS-3002".tw,kw,kf.                                                                                                                                                                                                                                                                            | 0       |
| 108 | ("ON-123300" or ON123300 or 1357470-29-1 or QJ8RO3296G).tw,kw,kf,fn.                                                                                                                                                                                                                           | 6       |
| 109 | "QHRD-110".tw,kw,kf.                                                                                                                                                                                                                                                                           | 0       |
| 110 | "TY-302".tw,kw,kf.                                                                                                                                                                                                                                                                             | 0       |
| 111 | "VS2-370".tw,kw,kf.                                                                                                                                                                                                                                                                            | 0       |
| 112 | Cyclin-Dependent Kinase 4/ai [antagonists & inhibitors]                                                                                                                                                                                                                                        | 887     |
| 113 | Cyclin-Dependent Kinase 6/ai [antagonists & inhibitors]                                                                                                                                                                                                                                        | 719     |
| 114 | ("CDK 4/6 inhibitor?" or "CDK4/6 inhibitor?" or "CDK 4/6i" or "CDK4/6i").tw,kw,kf.                                                                                                                                                                                                             | 1741    |
| 115 | ("cyclin dependent kinase 4/6" adj3 inhibitor?).tw,kw,kf.                                                                                                                                                                                                                                      | 353     |
| 116 | ((CDK4 or CDK-4 or CDK6 or CDK-6) adj3 inhibitor?).tw,kw,kf.                                                                                                                                                                                                                                   | 2296    |
| 117 | (("cell division protein kinase 4" or "cell division protein kinase 6") adj3 inhibitor?).tw,kw,kf.                                                                                                                                                                                             | 0       |
| 118 | (("cyclin dependent kinase 4" or "cyclin dependent kinase 6") adj3 inhibitor?).tw,kw,kf.                                                                                                                                                                                                       | 535     |
| 119 | or/102-118 [CDK 4/6i]                                                                                                                                                                                                                                                                          | 3643    |

| #   | Searches                                                                                                                                                                                                                                                                                                                                             | Results    |
|-----|------------------------------------------------------------------------------------------------------------------------------------------------------------------------------------------------------------------------------------------------------------------------------------------------------------------------------------------------------|------------|
| 120 | 101 and 119 [BREAST CANCER - CDK 4/6i]                                                                                                                                                                                                                                                                                                               | 1974       |
| 121 | (exp Child/ or exp Infant/) not (exp Adults/ or Adolescent/)                                                                                                                                                                                                                                                                                         | 1413635    |
| 122 | 120 not 121 [CHILD-, INFANT-ONLY REMOVED]                                                                                                                                                                                                                                                                                                            | 1974       |
| 123 | exp Animals/ not Humans/                                                                                                                                                                                                                                                                                                                             | 5056817    |
| 124 | 122 not 123 [ANIMAL-ONLY REMOVED]                                                                                                                                                                                                                                                                                                                    | 1952       |
| 125 | (comment or editorial or news or newspaper article).pt.                                                                                                                                                                                                                                                                                              | 1624173    |
| 126 | (letter not (letter and randomized controlled trial)).pt.                                                                                                                                                                                                                                                                                            | 1190648    |
| 127 | 124 not (125 or 126) [OPINION PIECES REMOVED]                                                                                                                                                                                                                                                                                                        | 1818       |
| 128 | Systematic Review.pt.                                                                                                                                                                                                                                                                                                                                | 210008     |
| 129 | exp Systematic Reviews as Topic/                                                                                                                                                                                                                                                                                                                     | 9322       |
| 130 | Meta Analysis.pt.                                                                                                                                                                                                                                                                                                                                    | 169310     |
| 131 | exp Meta-Analysis as Topic/                                                                                                                                                                                                                                                                                                                          | 25853      |
| 132 | (meta-analy* or metanaly* or metaanaly* or met analy* or integrative research or integrative review* or integrative overview* or research integration or research overview* or collaborative review*).tw,kw,kf.                                                                                                                                      | 256440     |
| 133 | (systematic review* or systematic overview* or evidence-based review* or evidence-based overview* or (evidence adj3 (review* or overview*)) or meta-review* or meta-overview* or meta-synthes* or mapping review? or rapid review* or "review of reviews" or scoping review? or umbrella review? or technology assessment* or HTA or HTAs).tw,kw,kf. | 336972     |
| 134 | exp Technology Assessment, Biomedical/                                                                                                                                                                                                                                                                                                               | 12007      |
| 135 | (cochrane or health technology assessment or evidence report or systematic reviews).jw.                                                                                                                                                                                                                                                              | 21742      |
| 136 | (network adj (MA or MAs)).tw,kw,kf.                                                                                                                                                                                                                                                                                                                  | 17         |
| 137 | (NMA or NMAs or MTC or MTCs or MAIC or MAICs).tw,kw,kf.                                                                                                                                                                                                                                                                                              | 8904       |
| 138 | indirect* compar*.tw,kw,kf.                                                                                                                                                                                                                                                                                                                          | 2619       |
| 139 | (indirect treatment* adj1 compar*).tw,kw,kf.                                                                                                                                                                                                                                                                                                         | 430        |
| 140 | (mixed treatment* adj1 compar*).tw,kw,kf.                                                                                                                                                                                                                                                                                                            | 518        |
| 141 | (multiple treatment* adj1 compar*).tw,kw,kf.                                                                                                                                                                                                                                                                                                         | 220        |
| 142 | (multi-treatment* adj1 compar*).tw,kw,kf.                                                                                                                                                                                                                                                                                                            | 3          |
| 143 | simultaneous* compar*.tw,kw,kf.                                                                                                                                                                                                                                                                                                                      | 1256       |
| 144 | mixed comparison?.tw,kw,kf.                                                                                                                                                                                                                                                                                                                          | 43         |
| 145 | review.pt.                                                                                                                                                                                                                                                                                                                                           | 3060425    |
| 146 | narrative review?.tw,kw,kf.                                                                                                                                                                                                                                                                                                                          | 22478      |
| 147 | or/128-146 [REVIEWS]                                                                                                                                                                                                                                                                                                                                 | 3339132    |
| 148 | 127 and 147 [BREAST CANCER - CDK 4/6i - REVIEWS]                                                                                                                                                                                                                                                                                                     | 557        |
| 149 | limit 148 to yr="2018-current"                                                                                                                                                                                                                                                                                                                       | 422        |
| 150 | 149 and ((202110* not ("20211001" or "20211002" or "20211003" or "20211004" or 20211005 20211006 or "20211007" or "20211008" or "20211009" or "20211010" or "20211011" or "20211012" or "20211013" or "20211014")) or 202111* or 202112* or 2022*).dt. [Update results - 14 Oct 2021 - Current]                                                      | 97         |
| 151 | <b>93 or 150 [COMBINED TRIALS &amp; REVIEWS RESULTS - Update - 14 Oct 2021 - Current - MEDLINE]</b>                                                                                                                                                                                                                                                  | <b>330</b> |

**Table S5: Updated Grey Literature Search Strategy**

| Database                         | Search Terms/Strategy                                     | Results         |
|----------------------------------|-----------------------------------------------------------|-----------------|
| Clinicaltrials.gov               | Breast cancer and CDK4/6                                  | 142             |
|                                  | Breast cancer and treatment pattern                       | 146             |
| WHO                              | Breast cancer and CDK4/6                                  | 10              |
|                                  | Breast cancer and treatment pattern                       | 1               |
| EudraCT                          | Breast cancer and CDK4/6                                  | 46              |
|                                  | Breast cancer and treatment pattern                       | 12              |
| Google Scholar                   | Breast cancer and CDK4/6 inhibitor and treatment sequence | 50 <sup>a</sup> |
|                                  | CDK4/6 and treatment pattern                              | 50 <sup>a</sup> |
|                                  | CDK4/6 and treatment sequence                             | 50 <sup>a</sup> |
|                                  | Breast cancer and treatment pattern                       | 50 <sup>a</sup> |
| Narrative Review<br>Bibliography | Studies relevant to treatment patterns                    | 6               |

<sup>a</sup> Top 50 hits in each independent search were reviewed.

## Online Resource 2: List of Studies Included or Excluded for Full-text Review

The complete list of studies included at the level of full-text review is provided in **Table S6**.

**Table S7** provides a list of the 53 studies excluded during the full-text review stage organized by exclusion reason. Of the 135 studies that were screened through the full-text review, 10 studies were excluded due to irrelevant intervention or comparator; seven studies were excluded because while it was a potentially relevant study, the study did not explicitly note treatment patterns; one study was excluded for irrelevant outcomes, and two studies were excluded due to study design. Finally, 33 narrative or systematic reviews published between Jan 1st 2018 to Jan 1st 2021 were excluded due to the publication date.

**Table S6: Studies Included for Full-text Review**

| Author, Year                  | Trial Name/ID | Title                                                                                                                                                                                                                    |
|-------------------------------|---------------|--------------------------------------------------------------------------------------------------------------------------------------------------------------------------------------------------------------------------|
| <b>Full-Text Publications</b> |               |                                                                                                                                                                                                                          |
| <b>Reviews</b>                |               |                                                                                                                                                                                                                          |
| Hui, 2021 [102]               | N/A           | CDK4/6 inhibitor plus endocrine therapy for hormone receptor-positive, HER2-negative metastatic breast cancer: The new standard of care                                                                                  |
| Kearney, 2021 [103]           | N/A           | Clinical trial data and emerging immunotherapeutic strategies: hormone receptor-positive, HER2- negative breast cancer                                                                                                   |
| Li, 2021 [104]                | N/A           | Advances in Therapy for Hormone Receptor (HR)-Positive, Human Epidermal Growth Factor Receptor 2 (HER2)-Negative Advanced Breast Cancer Patients Who Have Experienced Progression After Treatment with CDK4/6 Inhibitors |
| Loibl, 2021 [23]              | N/A           | Breast cancer                                                                                                                                                                                                            |
| Mavratzas, 2021 [105]         | N/A           | Treatment of Luminal Metastatic Breast Cancer beyond CDK4/6 Inhibition: Is There a Standard of Care in Clinical Practice?                                                                                                |
| Migliaccio, 2021 [106]        | N/A           | CDK4/6 inhibitors: A focus on biomarkers of response and post-treatment therapeutic strategies in hormone receptor-positive HER2-negative breast cancer                                                                  |
| Nagaraj, 2021 [107]           | N/A           | Clinical Challenges in the Management of Hormone Receptor-Positive, Human Epidermal Growth Factor Receptor 2-Negative Metastatic Breast Cancer: A Literature Review                                                      |
| Xu, 2021 [108]                | N/A           | Intrinsic and acquired resistance to CDK4/6 inhibitors and potential overcoming strategies                                                                                                                               |
| Cogliati, 2022 [109]          | N/A           | How to Treat HR+/HER2- Metastatic Breast Cancer Patients after CDK4/6 Inhibitors: An Unfinished Story                                                                                                                    |
| Munzone, 2021 [110]           | N/A           | Systematic review and meta-analysis of post-progression outcomes in ER+/HER2- metastatic breast cancer after CDK4/6 inhibitors within randomized clinical trials                                                         |
| <b>Clinical Trials</b>        |               |                                                                                                                                                                                                                          |
| Bardia, 2021a [93]            | NCT02338349   | Phase I Study of Elacestrant (RAD1901), a Novel Selective Estrogen Receptor Degradar, in ER-Positive, HER2-Negative Advanced Breast Cancer                                                                               |

| Author, Year                             | Trial Name/ID      | Title                                                                                                                                                                                                                                                                                           |
|------------------------------------------|--------------------|-------------------------------------------------------------------------------------------------------------------------------------------------------------------------------------------------------------------------------------------------------------------------------------------------|
| Bardia, 2021b [41]                       | TRINITI-1          | Phase I/II Trial of Exemestane, Ribociclib, and Everolimus in Women with HR+/HER2- Advanced Breast Cancer after Progression on CDK4/6 Inhibitors (TRINITI-1)                                                                                                                                    |
| Dudek, 2020 [55]                         | NCT03201913        | Phase 1 study of TTC-352 in patients with metastatic breast cancer progressing on endocrine and CDK4/6 inhibitor therapy                                                                                                                                                                        |
| Masuda, 2021 [49]                        | PALOMA-2, PALOMA-3 | Analysis of subsequent therapy in Japanese patients with hormone receptor-positive/human epidermal growth factor receptor 2-negative advanced breast cancer who received palbociclib plus endocrine therapy in PALOMA-2 and -3                                                                  |
| Neven, 2021 [68]                         | MONARCH 2          | MONARCH 2: Subgroup Analysis of Patients Receiving Abemaciclib Plus Fulvestrant as First-Line and Second-Line Therapy for HR+, HER2--Advanced Breast Cancer                                                                                                                                     |
| Rossi, 2019 [59]                         | TREnd              | Clinical outcomes after palbociclib with or without endocrine therapy in postmenopausal women with hormone receptor positive and HER2-negative metastatic breast cancer enrolled in the TREnd trial                                                                                             |
| Albanell, 2022 [88]                      | BioPER             | Palbociclib Rechallenge for Hormone Receptor-Positive/Human Epidermal Growth Factor Receptor-Negative Advanced Breast Cancer: Findings from the Phase II BioPER Trial                                                                                                                           |
| Bidard, 2022 [52]                        | EMERALD            | Elacestrant (oral selective estrogen receptor degrader) Versus Standard Endocrine Therapy for Estrogen Receptor-Positive, Human Epidermal Growth Factor Receptor 2-Negative Advanced Breast Cancer: Results From the Randomized Phase III EMERALD Trial                                         |
| Garcia-Saenz, 2022 [111]                 | NA                 | Sapanisertib plus Fulvestrant in Postmenopausal Women with Estrogen Receptor-Positive/HER2-Negative Advanced Breast Cancer after Progression on Aromatase Inhibitor                                                                                                                             |
| Lim, 2022 [97]                           | NA                 | Phase Ib/II Dose Expansion Study of Lenvatinib Combined with Letrozole in Postmenopausal Women with Hormone Receptor-Positive Breast Cancer                                                                                                                                                     |
| Martin, 2022a [90]                       | PEARL              | Overall survival with palbociclib plus endocrine therapy versus capecitabine in postmenopausal patients with hormone receptor-positive, HER2-negative metastatic breast cancer in the PEARL study                                                                                               |
| Zhang, 2022 [29]                         | LORDSHIPS          | Dalpiciclib Combined With Pyrotinib and Letrozole in Women With HER2-Positive, Hormone Receptor-Positive Metastatic Breast Cancer (LORDSHIPS): A Phase Ib Study                                                                                                                                 |
| <b>Prospective Observational Studies</b> |                    |                                                                                                                                                                                                                                                                                                 |
| Davie, 2021 [30]                         | N/A                | Real-world clinical profile, treatment patterns and patient-reported outcomes in a subset of HR+/HER2- advanced breast cancer patients with poor prognostic factors: data from an international study                                                                                           |
| Fountzilas, 2020 [47] <sup>a</sup>       | N/A                | Real-world clinical outcome and toxicity data and economic aspects in patients with advanced breast cancer treated with cyclin-dependent kinase 4/6 (CDK4/6) inhibitors combined with endocrine therapy: the experience of the Hellenic Cooperative Oncology Group                              |
| Palumbo, 2021 [69]                       | N/A                | Patterns of treatment and outcome of palbociclib plus endocrine therapy in hormone receptor-positive/HER2 receptor-negative metastatic breast cancer: a real-world multicentre Italian study                                                                                                    |
| Petracci, 2020 [48]                      | RENATA             | RENATA study-Latin American prospective experience: clinical outcome of patients treated with palbociclib in hormone receptor-positive metastatic breast cancer-real-world use                                                                                                                  |
| Schneeweiss, 2020 [67]                   | PRAEGNANT          | Initial experience with CDK4/6 inhibitor-based therapies compared to antihormone monotherapies in routine clinical use in patients with hormone receptor positive, HER2 negative breast cancer - Data from the PRAEGNANT research network for the first 2 years of drug availability in Germany |
| Engler, 2022 [34]                        | PRAEGNANT          | Implementation of CDK4/6 Inhibitors and its Influence on the Treatment Landscape of Advanced Breast Cancer Patients - Data from the Real-World Registry PRAEGNANT                                                                                                                               |
| Gharib, 2022 [76]                        | NA                 | Palbociclib and letrozole in hormone-receptor positive advanced breast cancer: Predictive response and prognostic factors                                                                                                                                                                       |

| Author, Year                               | Trial Name/ID | Title                                                                                                                                                                                                                                                                           |
|--------------------------------------------|---------------|---------------------------------------------------------------------------------------------------------------------------------------------------------------------------------------------------------------------------------------------------------------------------------|
| Shen, 2022 [83]                            | NA            | Treatment patterns, effectiveness, and patient-reported outcomes of palbociclib therapy in Chinese patients with advanced breast cancer: A multicenter ambispective real-world study                                                                                            |
| <b>Retrospective Observational Studies</b> |               |                                                                                                                                                                                                                                                                                 |
| Agrawal, 2021 [63]                         | N/A           | Multicentric real world evidence with palbociclib in hormone positive HER2 negative metastatic breast cancer in Indian population                                                                                                                                               |
| Basile, 2021 [36]                          | N/A           | First- and second-line treatment strategies for hormone-receptor (HR)-positive HER2-negative metastatic breast cancer: A real-world study                                                                                                                                       |
| Battisti, 2019 [86]                        | N/A           | Palbociclib and endocrine therapy in heavily pretreated hormone receptor-positive HER2-negative advanced breast cancer: the UK Compassionate Access Programme experience                                                                                                        |
| Boer, 2021 [61]                            | N/A           | Demographic Characteristics and Treatment Patterns Among Patients Receiving Palbociclib for HR+/HER2- Advanced Breast Cancer: A Nationwide Real-World Experience                                                                                                                |
| Brufsky, 2019 [70]                         | N/A           | Treatment Patterns and Outcomes Associated with Palbociclib Plus Letrozole for Postmenopausal Women With HR+/HER2- Advanced Breast Cancer Enrolled in an Expanded Access Program                                                                                                |
| Carter, 2021 [112]                         | N/A           | Real-world treatment patterns and outcomes of abemaciclib for the treatment of HR+, HER2- metastatic breast cancer                                                                                                                                                              |
| Collins, 2021 [91]                         | N/A           | A Real-World Evidence Study of CDK4/6 Inhibitor Treatment Patterns and Outcomes in Metastatic Breast Cancer by Germline BRCA Mutation Status                                                                                                                                    |
| Cook, 2021 [94]                            | N/A           | Everolimus Plus Exemestane Treatment in Patients with Metastatic Hormone Receptor-Positive Breast Cancer Previously Treated with CDK4/6 Inhibitor Therapy                                                                                                                       |
| Cui, 2021 [32]                             | N/A           | Predicting optimal treatment regimens for patients with HR+/HER2- breast cancer using machine learning based on electronic health records                                                                                                                                       |
| Dhakal, 2020 [95]                          | N/A           | Outcome of Everolimus-Based Therapy in Hormone-Receptor-Positive Metastatic Breast Cancer Patients After Progression on Palbociclib                                                                                                                                             |
| Goldschmidt, 2018 [35]                     | N/A           | Current Treatment Patterns Among Postmenopausal Women with HR+/HER2- Metastatic Breast Cancer in US Community Oncology Practices: An Observational Study                                                                                                                        |
| Gong, 2018 [113]                           | N/A           | A single institution experience with palbociclib toxicity requiring dose modifications                                                                                                                                                                                          |
| Jeong, 2021 [37]                           | N/A           | Comparison of the Effectiveness and Clinical Outcome of Everolimus Followed by CDK4/6 Inhibitors with the Opposite Treatment Sequence in Hormone Receptor-Positive, HER2-Negative Metastatic Breast Cancer                                                                      |
| Kessler, 2020 [89]                         | N/A           | Efficacy and safety of cyclin dependent kinases 4/6 inhibitors in the treatment of metastatic breast cancer: a real-world experience                                                                                                                                            |
| Li, 2021 [99]                              | N/A           | A multicenter analysis of treatment patterns and clinical outcomes of subsequent therapies after progression on palbociclib in HR+/HER2- metastatic breast cancer                                                                                                               |
| Lin, 2021 [71]                             | N/A           | Treatment patterns and clinical outcomes of palbociclib-based therapy received in US community oncology practices                                                                                                                                                               |
| Liu, 2020 [64]                             | N/A           | Clinical Outcomes of 130 Patients with Hormone Receptor-Positive and Human Epidermal Growth Factor Receptor 2-Negative Metastatic Breast Cancer Treated with Palbociclib plus Endocrine Therapy and Subsequent Therapy: A Real-World Single-Center Retrospective Study in China |
| Meegdes, 2021 [31]                         | SONABRE       | The implementation of CDK 4/6 inhibitors and its impact on treatment choices in HR+/HER2- advanced breast cancer patients: A study of the Dutch SONABRE Registry                                                                                                                |
| Mougalian, 2019 [54]                       | N/A           | Observational study of clinical outcomes of eribulin mesylate in metastatic breast cancer after cyclin-dependent kinase 4/6 inhibitor therapy                                                                                                                                   |



| Author, Year                | Trial Name/ID | Title                                                                                                                                                                                                                                                         |
|-----------------------------|---------------|---------------------------------------------------------------------------------------------------------------------------------------------------------------------------------------------------------------------------------------------------------------|
| Norman, 2021 [114]          | N/A           | Incidence and Severity of Myelosuppression with Palbociclib After Palliative Bone Radiation in Advanced Breast Cancer: A Single Center Experience and Review of Literature                                                                                    |
| Pizzuti, 2019 [115]         | N/A           | Palbociclib plus endocrine therapy in HER2 negative, hormonal receptor-positive, advanced breast cancer: A real-world experience                                                                                                                              |
| Princic, 2019 [38]          | N/A           | Predictors of systemic therapy sequences following a CDK 4/6 inhibitor-based regimen in post-menopausal women with hormone receptor positive, HEGFR-2 negative metastatic breast cancer                                                                       |
| Rath, 2021 [65]             | N/A           | Efficacy and safety of palbociclib and ribociclib in patients with estrogen and/or progesterone receptor positive, HER2 receptor negative metastatic breast cancer in routine clinical practice                                                               |
| Rozenblit, 2021 [100]       | N/A           | Patterns of treatment with everolimus exemestane in hormone receptor-positive HER2-negative metastatic breast cancer in the era of targeted therapy                                                                                                           |
| Taylor-Stokes, 2019 [116]   | IRIS          | Treatment patterns and clinical outcomes among patients receiving palbociclib in combination with an aromatase inhibitor or fulvestrant for HR+/HER2-negative advanced/metastatic breast cancer in real-world settings in the US: Results from the IRIS study |
| Varella, 2019 [72]          | N/A           | Real-world clinical outcomes and toxicity in metastatic breast cancer patients treated with palbociclib and endocrine therapy                                                                                                                                 |
| Waller, 2019 [117]          | IRIS          | Real-World Treatment Patterns and Clinical Outcomes in Patients Receiving Palbociclib for Hormone Receptor-Positive, Human Epidermal Growth Factor Receptor 2-Negative Advanced or Metastatic Breast Cancer in Argentina: The IRIS Study                      |
| Wander, 2021 [42]           | N/A           | Clinical Outcomes with Abemaciclib After Prior CDK4/6 Inhibitor Progression in Breast Cancer: A Multicenter Experience                                                                                                                                        |
| Xi, 2019 [51]               | N/A           | Retrospective Analysis of Treatment Patterns and Effectiveness of Palbociclib and Subsequent Regimens in Metastatic Breast Cancer                                                                                                                             |
| Zhang, 2021 [66]            | N/A           | The efficacy and safety of palbociclib combined with endocrine therapy in patients with hormone receptor-positive HER2-negative advanced breast cancer: a multi-center retrospective analysis                                                                 |
| Choong, 2022 [73]           | NA            | Clinical management of metastatic hormone receptor-positive, HER2-negative breast cancer (MBC) after CDK 4/6 inhibitors: a retrospective single-institution study                                                                                             |
| Endo, 2022 [74]             | NA            | Time to Chemotherapy for Patients With Estrogen Receptor-Positive Breast Cancer and Cyclin-Dependent Kinase 4 and 6 Inhibitor Use                                                                                                                             |
| Fernandez-Cuerva, 2022 [75] | NA            | Effectiveness and Safety of Palbociclib plus Endocrine Therapy in Hormone Receptor-Positive, HER2-Negative Metastatic Breast Cancer: Real-World Results                                                                                                       |
| Gao, 2021 [92]              | NA            | Overall survival in patients with hormone receptor-positive, HER2-negative, advanced or metastatic breast cancer treated with a cyclin-dependent kinase 4/6 inhibitor plus fulvestrant: a US Food and Drug Administration pooled analysis                     |
| Ha, 2022 [78]               | NA            | Palbociclib plus endocrine therapy significantly enhances overall survival of HR+/HER2- metastatic breast cancer patients compared to endocrine therapy alone in the second-line setting: A large institutional study                                         |
| Hayama, 2022 [57]           | NA            | Treatment Strategy for Patients with HR-Positive HER2-Negative Metastatic Breast Cancer That Progressed on CDK4/6 Inhibitors                                                                                                                                  |
| Kitano, 2022 [53]           | NA            | Everolimus for Treating Hormone Receptor-positive Metastatic Breast Cancer Previously Treated With Cyclin-dependent Kinase 4/6 Inhibitors                                                                                                                     |
| Li, 2021 [80]               | NA            | Real-world effectiveness and sensitivity of palbociclib plus endocrine therapy in HR+/HER2- patients with metastatic breast cancer                                                                                                                            |

| Author, Year                               | Trial Name/ID | Title                                                                                                                                                                                            |
|--------------------------------------------|---------------|--------------------------------------------------------------------------------------------------------------------------------------------------------------------------------------------------|
| Marineau, 2022 [118]                       | NA            | Cyclin-dependent kinase 4/6 inhibitor treatment use in women treated for advanced breast cancer: Integrating ASCO/NCODA patient-centered standards in a community pharmacy                       |
| Martin, 2022b [87]                         | NA            | Systemic Therapies Following Progression on First-line CDK4/6-inhibitor Treatment: Analysis of Real-world Data                                                                                   |
| Mo, 2022a [79]                             | NA            | Treatment patterns and clinical outcomes in patients with metastatic breast cancer treated with palbociclib-based therapies: real-world data in the Han population                               |
| Mo, 2022b [98]                             | NA            | Real-World Outcomes of Everolimus and Exemestane for the Treatment of Metastatic Hormone Receptor-Positive Breast Cancer in Patients Previously Treated With CDK4/6 Inhibitors                   |
| Mycock, 2022 [85]                          | IRIS          | Real-world treatment patterns and clinical outcomes in patients receiving palbociclib combinations for HR+/HER2- advanced/metastatic breast cancer in Japan: Results from the IRIS study         |
| Novick, 2022 [119]                         | NA            | Real world evidence study on treatment patterns and health resource utilization in patients with HR+/HER2- locally advanced or metastatic breast cancer in Korea                                 |
| Sawaki, 2022 [33]                          | NA            | Real-world treatment patterns of palbociclib and blood count monitoring in patients with advanced breast cancer in Japan                                                                         |
| Seki, 2022 [56]                            | NA            | Subsequent-abemaciclib Treatment After Disease Progression on Palbociclib in Patients With ER-positive HER2-negative Metastatic Breast Cancer                                                    |
| Smyth, 2022 [120]                          | NA            | Real-World Patient Characteristics, Utilization Patterns, and Outcomes of US Patients with HR+, HER2-Metastatic Breast Cancer Treated with Abemaciclib                                           |
| Whitaker, 2022 [40]                        | NA            | Racial inequities in second-line treatment and overall survival among patients with metastatic breast cancer                                                                                     |
| Yildirim, 2022 [84]                        | NA            | Clinical outcomes of cyclin-dependent kinase 4-6 (CDK 4-6) inhibitors in patients with male breast cancer: A multicenter study                                                                   |
| Zhong, 2022 [39]                           | NA            | Efficacy and safety of palbociclib plus endocrine therapy for patients with HR+/HER2- advanced breast cancer in real-world clinical practice                                                     |
| Zhou, 2022 [96]                            | NA            | Clinical outcomes of tucidinostat-based therapy after prior CDK4/6 inhibitor progression in hormone receptor-positive heavily pretreated metastatic breast cancer                                |
| <b>Trial Records</b>                       |               |                                                                                                                                                                                                  |
| <b>Retrospective Observational Studies</b> |               |                                                                                                                                                                                                  |
| ClinicalTrials.gov [121]                   | NA            | Description of Treatment Patterns and Description and Comparison of Healthcare Resource Utilization and Costs of Women With Metastatic HR+/HER2- Breast Cancer Treated With CDK4/6 Inhibitors    |
| ClinicalTrials.gov [122]                   | NA            | Treatment Patterns And Clinical Outcomes Among Patients in Latin America Receiving First Line Palbociclib Combinations For HR+/HER2- Advanced/Metastatic Breast Cancer In Real World Settings.   |
| ClinicalTrials.gov [123]                   | NA            | A Study to Describe the Breast Cancer Patient Population, Treatment, and Results in Indian Patients Receiving Combinations of the Medicines Called Palbociclib for Advanced Breast Cancer        |
| <b>Abstracts</b>                           |               |                                                                                                                                                                                                  |
| <b>Clinical Trials</b>                     |               |                                                                                                                                                                                                  |
| Bardia, 2019 [124]                         | TRINITY-1     | Triplet therapy (continuous ribociclib, everolimus, exemestane) in HR+/HER2- advanced breast cancer post progression on a CDK4/6 inhibitor (TRINITY-1): Efficacy, safety, and biomarker results. |
| <b>Prospective Observational Studies</b>   |               |                                                                                                                                                                                                  |
| Marschner, 2022 [81]                       | OPAL          | Second-line therapies of patients with early progression under CDK4/6-inhibitor in first-line – data from the registry platform OPAL                                                             |

| Author, Year                               | Trial Name/ID | Title                                                                                                                                                                                                  |
|--------------------------------------------|---------------|--------------------------------------------------------------------------------------------------------------------------------------------------------------------------------------------------------|
| <b>Retrospective Observational Studies</b> |               |                                                                                                                                                                                                        |
| Agrawal, 2020 [125]                        | N/A           | Real world evidence of palbociclib use in metastatic hormone positive HER negative metastatic breast cancer in Indian population                                                                       |
| dos Anjos, 2019 [46]                       | N/A           | A large retrospective analysis of CDK 4/6 inhibitor retreatment in ER+ metastatic breast cancer (MBC).                                                                                                 |
| Eziokwu, 2019 [45]                         | N/A           | Real-world evidence evaluating continuation of CDK4/6 inhibitors beyond first progression in hormone receptor-positive (HR+) metastatic breast cancer.                                                 |
| Giridhar, 2019 [58]                        | N/A           | Abstract P6-18-09: Clinical management of metastatic breast cancer (MBC) after CDK 4/6 inhibitors: A retrospective single-institution study                                                            |
| McLaurin, 2019 [126]                       | N/A           | A real-world evidence study of CDK4/6 inhibitor treatment patterns and outcomes in metastatic breast cancer by gBRCA mutation status.                                                                  |
| Tamragouri, 2019 [44]                      | N/A           | Abemaciclib with or without fulvestrant for the treatment of hormone receptor-positive and HER2-negative metastatic breast cancer with disease progression following prior treatment with palbociclib. |
| Wander, 2019 [43]                          | N/A           | A multicenter analysis of abemaciclib after progression on palbociclib in patients (pts) with hormone receptor-positive (HR+)/HER2- metastatic breast cancer (MBC).                                    |
| Check, 2022 [127]                          | NA            | Treatment patterns and health care resource use of patients with metastatic breast cancer with HER2-low expression: A cancer registry-linked insurance claims study                                    |
| Gousis, 2022 [77]                          | NA            | Beyond First Line CDK4/6 Inhibitors (CDK4/6i) and Aromatase Inhibitors (AI) in Patients with Oestrogen Receptor Positive Metastatic Breast Cancer (ER+ MBC): The Guy's Cancer Centre Experience        |
| Parola, 2022 [128]                         | NA            | CDK4/6 inhibitors in hormone receptor-positive, HER2-negative, locally advanced breast cancer (LABC): Biological and clinical activity, and post-surgical approaches                                   |
| Sampedro-Gimeno, 2021 [82]                 | NA            | Observational real world data with palbociclib associated to hormone therapy for advanced breast carcinoma                                                                                             |

<sup>a</sup> Prospective-retrospective observational study.

Abbreviations: ASCO = American Society of Clinical Oncology; CDK4/6i = cyclin-dependent kinase 4/6 inhibitor; EBCC = European Breast Cancer Conference; ER = estrogen receptor; HER2 = human epidermal growth factor receptor 2; HR = hormone receptor; MBC = metastatic breast cancer; N/A = not applicable; SABC = San Antonio Breast Cancer Symposium.

**Table S7: Studies Excluded for Full-text Review**

| Reason for Exclusion/Reference                                                                                                                                                                                                                                                                                                                                                                                                                                                             |
|--------------------------------------------------------------------------------------------------------------------------------------------------------------------------------------------------------------------------------------------------------------------------------------------------------------------------------------------------------------------------------------------------------------------------------------------------------------------------------------------|
| <b>Intervention/comparator (n = 10)</b>                                                                                                                                                                                                                                                                                                                                                                                                                                                    |
| Wang B, Li R, Wu S, Liu X, Ren J, Li J, et al. Breast Cancer Resistance to Cyclin-Dependent Kinases 4/6 Inhibitors: Intricacy of the Molecular Mechanisms. <i>Front Oncol.</i> 2021;11:651541. doi: <a href="https://dx.doi.org/10.3389/fonc.2021.651541">https://dx.doi.org/10.3389/fonc.2021.651541</a> .                                                                                                                                                                                |
| Braal CL, Jongbloed EM, Wilting SM, Mathijssen RHJ, Koolen SLW, Jager A. Inhibiting CDK4/6 in Breast Cancer with Palbociclib, Ribociclib, and Abemaciclib: Similarities and Differences. <i>Drugs.</i> 2021;81(3):317-31. doi: <a href="https://dx.doi.org/10.1007/s40265-020-01461-2">https://dx.doi.org/10.1007/s40265-020-01461-2</a> .                                                                                                                                                 |
| Tolba MF, Elghazaly H, Bousoik E, Elmazar MMA, Tolaney SM. Novel combinatorial strategies for boosting the efficacy of immune checkpoint inhibitors in advanced breast cancers. <i>Clinical &amp; Translational Oncology: Official Publication of the Federation of Spanish Oncology Societies &amp; of the National Cancer Institute of Mexico.</i> 2021;23(10):1979-94. doi: <a href="https://dx.doi.org/10.1007/s12094-021-02613-w">https://dx.doi.org/10.1007/s12094-021-02613-w</a> . |

| Reason for Exclusion/Reference                                                                                                                                                                                                                                                                                                                                                                                                                                                                |
|-----------------------------------------------------------------------------------------------------------------------------------------------------------------------------------------------------------------------------------------------------------------------------------------------------------------------------------------------------------------------------------------------------------------------------------------------------------------------------------------------|
| Werutsky G, Reinert T, Rosa ML, Barrios CH. Real-world Data on First-line Systemic Therapy for Hormone Receptor-positive HER2-negative Metastatic Breast Cancer: A Trend Shift in the Era of CDK 4/6 Inhibitors. <i>Clin Breast Cancer</i> . 2021;20:20. doi: <a href="https://dx.doi.org/10.1016/j.clbc.2021.04.003">https://dx.doi.org/10.1016/j.clbc.2021.04.003</a> .                                                                                                                     |
| Chang DY, Ma WL, Lu YS. Role of Alpelisib in the Treatment of PIK3CA-Mutated Breast Cancer: Patient Selection and Clinical Perspectives. <i>Ther Clin Risk Manag</i> . 2021;17:193-207. doi: <a href="https://dx.doi.org/10.2147/TCRM.S251668">https://dx.doi.org/10.2147/TCRM.S251668</a> .                                                                                                                                                                                                  |
| Ratosa I, Orazem M, Scoccimarro E, Steinacher M, Dominici L, Aquilano M, et al. Cyclin-Dependent Kinase 4/6 Inhibitors Combined With Radiotherapy for Patients With Metastatic Breast Cancer. <i>Clin Breast Cancer</i> . 2020;20(6):495-502. doi: <a href="https://dx.doi.org/10.1016/j.clbc.2020.05.013">https://dx.doi.org/10.1016/j.clbc.2020.05.013</a> .                                                                                                                                |
| Mayer EL, DeMichele A, Rugo HS, Miller K, Waks AG, Come SE, et al. A phase II feasibility study of palbociclib in combination with adjuvant endocrine therapy for hormone receptor-positive invasive breast carcinoma. <i>Ann Oncol</i> . 2019;30(9):1514-20. doi: <a href="https://dx.doi.org/10.1093/annonc/mdz198">https://dx.doi.org/10.1093/annonc/mdz198</a> .                                                                                                                          |
| Kish JK, Ward MA, Garofalo D, Ahmed HV, McRoy L, Laney J, et al. Real-world evidence analysis of palbociclib prescribing patterns for patients with advanced/metastatic breast cancer treated in community oncology practice in the USA one year post approval. <i>Breast Cancer Res</i> . 2018;20(1):37. doi: <a href="https://dx.doi.org/10.1186/s13058-018-0958-2">https://dx.doi.org/10.1186/s13058-018-0958-2</a> .                                                                      |
| Goyal RK, Cuyun Carter G, Nagar SP, Nash Smyth E, Price GL, Parikh RC, et al. Treatment patterns, adverse events, and direct and indirect economic burden in a privately insured population of patients with HR+/HER2- metastatic breast cancer in the United States. <i>Expert Rev Pharmacoecon Outcomes Res</i> . 2021;21(4):699-710. doi: <a href="https://dx.doi.org/10.1080/14737167.2020.1804871">https://dx.doi.org/10.1080/14737167.2020.1804871</a> .                                |
| Rugo HS, Lerebours F, Ciruelos E, Drullinsky P, Ruiz-Borrego M, Neven P, et al. Alpelisib plus fulvestrant in PIK3CA-mutated, hormone receptor-positive advanced breast cancer after a CDK4/6 inhibitor (BYLieve): one cohort of a phase 2, multicentre, open-label, non-comparative study. <i>Lancet Oncol</i> . 2021;22(4):489-98. doi: <a href="https://dx.doi.org/10.1016/S1470-2045(21)00034-6">https://dx.doi.org/10.1016/S1470-2045(21)00034-6</a> .                                   |
| <b><i>Does not explicitly note treatment patterns in the full text review (n = 7)</i></b>                                                                                                                                                                                                                                                                                                                                                                                                     |
| Nakano S, Imawari Y, Mibu A, Kato S, Yamaguchi S, Otsuka M, et al. Use of molecular targeted therapy for hormone receptor-positive, human epidermal growth factor 2-negative metastatic breast cancer in real-world clinical practice. <i>J Nippon Med Sch</i> . 2021;19:19. doi: <a href="https://dx.doi.org/10.1272/jnms.JNMS.2022_89-203">https://dx.doi.org/10.1272/jnms.JNMS.2022_89-203</a> .                                                                                           |
| Abdel-Razeq H, Sharaf B, AlMasri R, Abdel-Razeq R, Tamimi F, Khader O, Salama O, Abunasser M, Edaily S, Abdulelah H. Thromboembolic Events in Patients with HER2-Negative, Hormone Receptor-Positive, Metastatic Breast Cancer Treated with Ribociclib Combined with Letrozole or Fulvestrant: A Real-World Data. <i>Cancer Manag Res</i> . 2022 Mar 8;14:1033-1041. doi: 10.2147/CMAR.S353584. PMID: 35300061; PMCID: PMC8921668.                                                            |
| Hamilton E, Cortes J, Ozyilkan O, Chen SC, Petrakova K, Manikhas A, Jerusalem G, Hegg R, Huober J, Zhang W, Chen Y, Martin M. nextMONARCH Phase 2 randomized clinical trial: overall survival analysis of abemaciclib monotherapy or in combination with tamoxifen in patients with endocrine-refractory HR + , HER2- metastatic breast cancer. <i>Breast Cancer Res Treat</i> . 2022 Aug;195(1):55-64. doi: 10.1007/s10549-022-06662-9. Epub 2022 Jul 12. PMID: 35829935; PMCID: PMC9338008. |
| Kraus AL, Yu-Kite M, Mardekian J, Cotter MJ, Kim S, Decembrino J, Snow T, Carson KR, Motyl Rockland J, Gossai A, Wilner K, Wang DD, Huang Bartlett C, Oharu N, Schnell P, VanArsdale T, Lu DR, Tursi JM. Real-World Data of Palbociclib in Combination With Endocrine Therapy for the Treatment of Metastatic Breast Cancer in Men. <i>Clin Pharmacol Ther</i> . 2022 Jan;111(1):302-309. doi: 10.1002/cpt.2454. Epub 2021 Nov 19. PMID: 34668577.                                            |
| Lindeman GJ, Fernando TM, Bowen R, Jerzak KJ, Song X, Decker T, Boyle F, McCune S, Armstrong A, Shannon C, Bertelli G, Chang CW, Desai R, Gupta K, Wilson TR, Flechais A, Bardia A. VERONICA: Randomized Phase II Study of Fulvestrant and Venetoclax in ER-Positive Metastatic Breast Cancer Post-CDK4/6 Inhibitors - Efficacy, Safety, and Biomarker Results. <i>Clin Cancer Res</i> . 2022 Aug 2;28(15):3256-3267. doi: 10.1158/1078-0432.CCR-21-3811. PMID: 35583555.                     |
| Parati MC, Pedersini R, Perego G, Reduzzi R, Savio T, Cabiddu M, Borgonovo K, Ghilardi M, Luciani A, Petrelli F. Ribociclib in the Treatment of Hormone-Receptor Positive/HER2-Negative Advanced and Early Breast Cancer: Overview of Clinical Data and Patients Selection. <i>Breast Cancer (Dove Med Press)</i> . 2022 Apr 12;14:101-111. doi: 10.2147/BCTT.S341857. PMID: 35440873; PMCID: PMC9013420.                                                                                     |
| Krishnamurthy, Jairam, Jingqin Luo, Rama Suresh, Foluso Ademuyiwa, Caron Rigden, Timothy Rearden, Katherine Clifton et al. "A phase II trial of an alternative schedule of palbociclib and embedded serum TK1 analysis." <i>NPJ breast cancer</i> 8, no. 1 (2022): 1-7.                                                                                                                                                                                                                       |

| Reason for Exclusion/Reference                                                                                                                                                                                                                                                                                                                                                                                                                                                        |
|---------------------------------------------------------------------------------------------------------------------------------------------------------------------------------------------------------------------------------------------------------------------------------------------------------------------------------------------------------------------------------------------------------------------------------------------------------------------------------------|
| <b>Outcomes (n = 1)</b>                                                                                                                                                                                                                                                                                                                                                                                                                                                               |
| Decker T, Bichler M, Birtel A, Fischer G, Geiger K, Gaenger S, Nonnenbroich C, Dechow T, Muendlein A. Clonal Evolution in Patients with Hormone Receptor Positive, HER-2 Negative Breast Cancer Treated with Chemotherapy or CDK4/6 Inhibitors. <i>Oncol Res Treat.</i> 2022;45(5):248-253. doi: 10.1159/000523758. Epub 2022 Feb 25. PMID: 35220309.                                                                                                                                 |
| <b>Study Design (n = 2)</b>                                                                                                                                                                                                                                                                                                                                                                                                                                                           |
| Fontana E, Torga G, Fostea R, Cleator S, Wasserman E, Murat A, Arkenau HT. Sustained Tumor Regression With Zenocutuzumab, a Bispecific Antibody Targeting Human Epidermal Growth Factor Receptor 2/Human Epidermal Growth Factor Receptor 3 Signaling, in <i>NRG1</i> Fusion-Positive, Estrogen Receptor-Positive Breast Cancer After Progression on a Cyclin-Dependent Kinase 4/6 Inhibitor. <i>JCO Precis Oncol.</i> 2022 Aug;6:e2100446. doi: 10.1200/PO.21.00446. PMID: 35977350. |
| Murali B, Durbin L, Vijaykumar S, Yang L, Li S, Zhao L, Hawthorne S, Kanas G, Davis C, Clark O. Treatment of HR+/HER2- breast cancer in urban mainland China: results from the CancerMPact Survey 2019. <i>Breast Cancer Res Treat.</i> 2022 Oct;195(3):441-451. doi: 10.1007/s10549-022-06709-x. Epub 2022 Aug 20. PMID: 35986800; PMCID: PMC9464725.                                                                                                                                |
| <b>Review published between Jan 1st 2018 to Jan 1st 2021 (n = 33)</b>                                                                                                                                                                                                                                                                                                                                                                                                                 |
| Flaum L, Gradishar W. Advances in Endocrine Therapy for Postmenopausal Metastatic Breast Cancer. <i>Cancer Treat Res.</i> 2018;173:141-54. doi: <a href="https://dx.doi.org/10.1007/978-3-319-70197-4_9">https://dx.doi.org/10.1007/978-3-319-70197-4_9</a> .                                                                                                                                                                                                                         |
| Aggelis V, Johnston SRD. Advances in Endocrine-Based Therapies for Estrogen Receptor-Positive Metastatic Breast Cancer. <i>Drugs.</i> 2019;79(17):1849-66.                                                                                                                                                                                                                                                                                                                            |
| Shi YY, F.; Huang, D.; Guan, X. Androgen blockade based clinical trials landscape in triple negative breast cancer. <i>Biochim.</i> 2018;1870(2):283-90. doi: <a href="https://dx.doi.org/10.1016/j.bbcn.2018.05.004">https://dx.doi.org/10.1016/j.bbcn.2018.05.004</a> .                                                                                                                                                                                                             |
| Li JH, X.; Zhao, F.; Ren, D.; Ahmad, R.; Yuan, X.; Du, F.; Zhao, J. Association of Cyclin-Dependent Kinases 4 and 6 Inhibitors With Survival in Patients With Hormone Receptor-Positive Metastatic Breast Cancer: A Systematic Review and Meta-analysis. <i>JAMA netw.</i> 2020;3(10):e2020312. doi: <a href="https://dx.doi.org/10.1001/jamanetworkopen.2020.20312">https://dx.doi.org/10.1001/jamanetworkopen.2020.20312</a> .                                                      |
| Spring LM, Wander SA, Zangardi M, Bardia A. CDK 4/6 Inhibitors in Breast Cancer: Current Controversies and Future Directions. <i>Curr Oncol Rep.</i> 2019;21(3):25. doi: <a href="https://dx.doi.org/10.1007/s11912-019-0769-3">https://dx.doi.org/10.1007/s11912-019-0769-3</a> .                                                                                                                                                                                                    |
| Choo JR, Lee SC. CDK4-6 inhibitors in breast cancer: current status and future development. <i>Expert Opin Drug Metab Toxicol.</i> 2018;14(11):1123-38. doi: <a href="https://dx.doi.org/10.1080/17425255.2018.1541347">https://dx.doi.org/10.1080/17425255.2018.1541347</a> .                                                                                                                                                                                                        |
| Pernas S, Tolaney SM, Winer EP, Goel S. CDK4/6 inhibition in breast cancer: current practice and future directions. <i>Ther Adv Med Oncol.</i> 2018;10:1758835918786451. doi: <a href="https://dx.doi.org/10.1177/1758835918786451">https://dx.doi.org/10.1177/1758835918786451</a> .                                                                                                                                                                                                 |
| Eggersmann TK, Degenhardt T, Gluz O, Wuerstlein R, Harbeck N. CDK4/6 Inhibitors Expand the Therapeutic Options in Breast Cancer: Palbociclib, Ribociclib and Abemaciclib. <i>Biodrugs.</i> 2019;33(2):125-35. doi: <a href="https://dx.doi.org/10.1007/s40259-019-00337-6">https://dx.doi.org/10.1007/s40259-019-00337-6</a> .                                                                                                                                                        |
| Fedele P, Sanna V, Fancellu A, Cinieri S. A clinical evaluation of treatments that target cell cycle machinery in breast cancer. <i>Expert Opin Pharmacother.</i> 2019;20(18):2305-15. doi: <a href="https://dx.doi.org/10.1080/14656566.2019.1672659">https://dx.doi.org/10.1080/14656566.2019.1672659</a> .                                                                                                                                                                         |
| Gul A, Leyland-Jones B, Dey N, De P. A combination of the PI3K pathway inhibitor plus cell cycle pathway inhibitor to combat endocrine resistance in hormone receptor-positive breast cancer: a genomic algorithm-based treatment approach. <i>Am J Cancer Res.</i> 2018;8(12):2359-76.                                                                                                                                                                                               |
| Liu ZB, Zhang L, Bian J, Jian J. Combination Strategies of Checkpoint Immunotherapy in Metastatic Breast Cancer. <i>Onco Targets Ther.</i> 2020;13:2657-66. doi: <a href="https://dx.doi.org/10.2147/OTT.S240655">https://dx.doi.org/10.2147/OTT.S240655</a> .                                                                                                                                                                                                                        |
| Brandao M, Ponde NF, Poggio F, Kotecki N, Salis M, Lambertini M, et al. Combination therapies for the treatment of HER2-positive breast cancer: current and future prospects. <i>Expert Rev Anticancer Ther.</i> 2018;18(7):629-49. doi: <a href="https://dx.doi.org/10.1080/14737140.2018.1477596">https://dx.doi.org/10.1080/14737140.2018.1477596</a> .                                                                                                                            |

| Reason for Exclusion/Reference                                                                                                                                                                                                                                                                                                                                                                                                                                                        |
|---------------------------------------------------------------------------------------------------------------------------------------------------------------------------------------------------------------------------------------------------------------------------------------------------------------------------------------------------------------------------------------------------------------------------------------------------------------------------------------|
| Ballinger TJ, Meier JBJ, V. M. Current Landscape of Targeted Therapies for Hormone-Receptor Positive, HER2 Negative Metastatic Breast Cancer. <i>Front Oncol.</i> 2018;8:308. doi: <a href="https://dx.doi.org/10.3389/fonc.2018.00308">https://dx.doi.org/10.3389/fonc.2018.00308</a> .                                                                                                                                                                                              |
| Spring LM, Wander SA, Andre F, Moy B, Turner NC, Bardia A. Cyclin-dependent kinase 4 and 6 inhibitors for hormone receptor-positive breast cancer: past, present, and future. <i>Lancet.</i> 2020;395(10226):817-27. doi: <a href="https://dx.doi.org/10.1016/S0140-6736(20)30165-3">https://dx.doi.org/10.1016/S0140-6736(20)30165-3</a> .                                                                                                                                           |
| El Sayed R, El Jamal L, El Iskandarani S, Kort J, Abdel Salam M, Assi H. Endocrine and Targeted Therapy for Hormone-Receptor-Positive, HER2-Negative Advanced Breast Cancer: Insights to Sequencing Treatment and Overcoming Resistance Based on Clinical Trials. <i>Front Oncol.</i> 2019;9:510. doi: <a href="https://dx.doi.org/10.3389/fonc.2019.00510">https://dx.doi.org/10.3389/fonc.2019.00510</a> .                                                                          |
| Brufsky AM, Dickler MN. Estrogen Receptor-Positive Breast Cancer: Exploiting Signaling Pathways Implicated in Endocrine Resistance. <i>Oncologist.</i> 2018;23(5):528-39. doi: <a href="https://dx.doi.org/10.1634/theoncologist.2017-0423">https://dx.doi.org/10.1634/theoncologist.2017-0423</a> .                                                                                                                                                                                  |
| Vijayaraghavan S, Moulder S, Keyomarsi K, Layman RM. Inhibiting CDK in Cancer Therapy: Current Evidence and Future Directions. <i>Target Oncol.</i> 2018;13(1):21-38. doi: <a href="https://dx.doi.org/10.1007/s11523-017-0541-2">https://dx.doi.org/10.1007/s11523-017-0541-2</a> .                                                                                                                                                                                                  |
| D'Souza A, Spicer DL, J. Overcoming endocrine resistance in metastatic hormone receptor-positive breast cancer. <i>J Hematol Oncol.</i> 2018;11(1):80. doi: <a href="https://dx.doi.org/10.1186/s13045-018-0620-6">https://dx.doi.org/10.1186/s13045-018-0620-6</a> .                                                                                                                                                                                                                 |
| Pelizzari G, Gerratana L, Basile D, Fanotto V, Bartoletti M, Liguori A, et al. Post-neoadjuvant strategies in breast cancer: From risk assessment to treatment escalation. <i>Cancer Treat Rev.</i> 2019;72:7-14. doi: <a href="https://dx.doi.org/10.1016/j.ctrv.2018.10.014">https://dx.doi.org/10.1016/j.ctrv.2018.10.014</a> .                                                                                                                                                    |
| Ding L, Cao J, Lin W, Chen H, Xiong X, Ao H, et al. The Roles of Cyclin-Dependent Kinases in Cell-Cycle Progression and Therapeutic Strategies in Human Breast Cancer. <i>Int J Mol Sci.</i> 2020;21(6):13. doi: <a href="https://dx.doi.org/10.3390/ijms21061960">https://dx.doi.org/10.3390/ijms21061960</a> .                                                                                                                                                                      |
| Xi J, Ma CX. Sequencing Endocrine Therapy for Metastatic Breast Cancer: What Do We Do After Disease Progression on a CDK4/6 Inhibitor? <i>Curr Oncol Rep.</i> 2020;22(6):57. doi: <a href="https://dx.doi.org/10.1007/s11912-020-00917-8">https://dx.doi.org/10.1007/s11912-020-00917-8</a> .                                                                                                                                                                                         |
| Occhipinti G, Romagnoli E, Santoni M, Cimadamore A, Sorgentoni G, Cecati M, et al. Sequential or Concomitant Inhibition of Cyclin-Dependent Kinase 4/6 Before mTOR Pathway in Hormone-Positive HER2 Negative Breast Cancer: Biological Insights and Clinical Implications. <i>Front.</i> 2020;11:349. doi: <a href="https://dx.doi.org/10.3389/fgene.2020.00349">https://dx.doi.org/10.3389/fgene.2020.00349</a> .                                                                    |
| Ribnikar D, Volovat SR, Cardoso F. Targeting CDK4/6 pathways and beyond in breast cancer. <i>Breast.</i> 2019;43:8-17. doi: <a href="https://dx.doi.org/10.1016/j.breast.2018.10.001">https://dx.doi.org/10.1016/j.breast.2018.10.001</a> .                                                                                                                                                                                                                                           |
| Thanopoulou E, Khader L, Caira M, Wardley A, Ettl J, Miglietta F, et al. Therapeutic Strategies for the Management of Hormone Receptor-Positive, Human Epidermal Growth Factor Receptor 2-Positive (HR+/HER2+) Breast Cancer: A Review of the Current Literature. <i>Cancers (Basel).</i> 2020;12(11):10. doi: <a href="https://dx.doi.org/10.3390/cancers12113317">https://dx.doi.org/10.3390/cancers12113317</a> .                                                                  |
| Sharifi MN, Anandan A, Grogan P, O'Regan RM. Therapy after cyclin-dependent kinase inhibition in metastatic hormone receptor-positive breast cancer: Resistance mechanisms and novel treatment strategies. <i>Cancer.</i> 2020;126(15):3400-16. doi: <a href="https://dx.doi.org/10.1002/cncr.32931">https://dx.doi.org/10.1002/cncr.32931</a> .                                                                                                                                      |
| Abraham J, Coleman R, Elias A, Holmes FA, Kalinsky K, Kittaneh M, et al. Use of cyclin-dependent kinase (CDK) 4/6 inhibitors for hormone receptor-positive, human epidermal growth factor receptor 2-negative, metastatic breast cancer: a roundtable discussion by The Breast Cancer Therapy Expert Group (BCTEG). <i>Breast Cancer Res Treat.</i> 2018;171(1):11-20. doi: <a href="https://dx.doi.org/10.1007/s10549-018-4783-1">https://dx.doi.org/10.1007/s10549-018-4783-1</a> . |
| Gao JJ, Cheng J, Bloomquist E, Sanchez J, Wedam SB, Singh H, et al. CDK4/6 inhibitor treatment for patients with hormone receptor-positive, HER2-negative, advanced or metastatic breast cancer: a US Food and Drug Administration pooled analysis. <i>Lancet Oncol.</i> 2020;21(2):250-60. doi: <a href="https://dx.doi.org/10.1016/S1470-2045(19)30804-6">https://dx.doi.org/10.1016/S1470-2045(19)30804-6</a> .                                                                    |
| Sammons S, Shastry M, Dent S, Anders C, Hamilton E. Practical Treatment Strategies and Future Directions After Progression While Receiving CDK4/6 Inhibition and Endocrine Therapy in Advanced HR <sup>+</sup> /HER2 <sup>-</sup> Breast Cancer. <i>Clin Breast Cancer.</i> 2020;20(1):1-11. doi: <a href="https://dx.doi.org/10.1016/j.clbc.2019.06.017">https://dx.doi.org/10.1016/j.clbc.2019.06.017</a> .                                                                         |
| Hortobagyi GN. Ribociclib for the first-line treatment of advanced hormone receptor-positive breast cancer: a review of subgroup analyses from the MONALEESA-2 trial. <i>Breast Cancer Res.</i> 2018;20(1):123. doi: <a href="https://dx.doi.org/10.1186/s13058-018-1050-7">https://dx.doi.org/10.1186/s13058-018-1050-7</a> .                                                                                                                                                        |

| Reason for Exclusion/Reference                                                                                                                                                                                                                                                                                                              |
|---------------------------------------------------------------------------------------------------------------------------------------------------------------------------------------------------------------------------------------------------------------------------------------------------------------------------------------------|
| Nakayama T, Fujisawa F. Therapy options after CDK4/6 inhibitors for HR+, HER2- postmenopausal metastatic/recurrent breast cancer in Japan: a role for mammalian target of rapamycin inhibitors? <i>Fut Oncol.</i> 2020;16(24):1851-62. doi: <a href="https://dx.doi.org/10.2217/fo-2020-0326">https://dx.doi.org/10.2217/fo-2020-0326</a> . |
| Niraula S. Why upfront use of CDK inhibitors for the treatment of advanced breast cancer may be wasteful, and how we can increase their value. <i>Breast.</i> 2019;43:81-4. doi: <a href="https://dx.doi.org/10.1016/j.breast.2018.11.008">https://dx.doi.org/10.1016/j.breast.2018.11.008</a> .                                            |
| Foulon A, Theret P, Rodat-Despoix L, Kischel P. Beyond Chemotherapies: Recent Strategies in Breast Cancer Treatment. <i>Cancers (Basel).</i> 2020;12(9):16. doi: <a href="https://dx.doi.org/10.3390/cancers12092634">https://dx.doi.org/10.3390/cancers12092634</a> .                                                                      |
| de Boer R, Hui R, Lim E, Yeo B, Zdenkowski N. Optimizing care for younger women with hormone receptor-positive, HER2-negative metastatic breast cancer. <i>Asia Pac J Clin Oncol.</i> 2020;16 Suppl 5:3-14. doi: <a href="https://dx.doi.org/10.1111/ajco.13461">https://dx.doi.org/10.1111/ajco.13461</a> .                                |

### Online Resource 3: Detailed Characteristics of Reviews

**Table S8: Summary of Review Characteristics**

| Reference           | Topic                                                                                                     | Unique References <sup>a</sup> | Patient Population                                                                                 | Treatment Patterns Discussed                                                                                                                                                                                                                                                                                                                                                                                                                                                                                                                                                                                                                                     |
|---------------------|-----------------------------------------------------------------------------------------------------------|--------------------------------|----------------------------------------------------------------------------------------------------|------------------------------------------------------------------------------------------------------------------------------------------------------------------------------------------------------------------------------------------------------------------------------------------------------------------------------------------------------------------------------------------------------------------------------------------------------------------------------------------------------------------------------------------------------------------------------------------------------------------------------------------------------------------|
| Hui, 2021 [102]     | Recent efficacy findings from key phase III clinical trials of CDK4/6i + ET in patients with HR+/HER2 mBC | 11                             | <ul style="list-style-type: none"> <li>• HR+/HER2- mBC</li> <li>• Progressed on CDK4/6i</li> </ul> | <ul style="list-style-type: none"> <li>• ET -&gt; Abemaciclib + AI</li> <li>• AI -&gt; Palbociclib + ET</li> <li>• CDK4/6i -&gt; Alpelisib + Fulvestrant</li> <li>• CDK4/6i -&gt; Ribociclib + EVE + EXE</li> <li>• CDK4/6i -&gt; Targeted Therapy (CDK4/6i-based, PI3Ki-based)</li> </ul>                                                                                                                                                                                                                                                                                                                                                                       |
| Kearney, 2021 [103] | Current and emerging combination strategies for treatment of HR+/HER2- BC                                 | 1                              | <ul style="list-style-type: none"> <li>• HR+/HER2- mBC</li> </ul>                                  | <ul style="list-style-type: none"> <li>• CDK4/6i -&gt; CDK4/6i-based</li> </ul>                                                                                                                                                                                                                                                                                                                                                                                                                                                                                                                                                                                  |
| Li, 2021 [104]      | Recent and future treatment strategies post-CDK4/6i                                                       | 24                             | <ul style="list-style-type: none"> <li>• HR+/HER2- aBC</li> <li>• Progressed on CDK4/6i</li> </ul> | <ul style="list-style-type: none"> <li>• CDK4/6i -&gt; CDK4/6i</li> <li>• CDK4/6i -&gt; PI3Ki</li> <li>• CDK4/6i -&gt; mTORi</li> <li>• CDK4/6i -&gt; PARPi</li> <li>• CDK4/6i -&gt; Chemotherapy</li> <li>• CDK4/6i -&gt; Other (eg, CDK7i, BCL2i)</li> <li>• CDK4/6i -&gt; ET-based</li> </ul>                                                                                                                                                                                                                                                                                                                                                                 |
| Loibl, 2021 [23]    | Biology and treatment management pathways for patients with eBC and mBC                                   | 4                              | <ul style="list-style-type: none"> <li>• eBC</li> <li>• mBC (ER+/-, HER2+/-, TNBC)</li> </ul>      | <ul style="list-style-type: none"> <li>• CDK4/6i + AI/Fulvestrant -&gt; Alpelisib + Fulvestrant</li> <li>• ET -&gt; Different ET + CDK4/6i</li> <li>• CDK4/6i + AI/Fulvestrant -&gt; ET + EVE</li> <li>• CDK4/6i + AI/Fulvestrant -&gt; Different AI</li> <li>• CDK4/6i + AI/Fulvestrant -&gt; Talazoparib</li> <li>• CDK4/6i + AI/Fulvestrant -&gt; Fulvestrant</li> <li>• CDK4/6i + AI -&gt; Different AI</li> <li>• CDK4/6i -&gt; Targeted Therapy (CDK4/6i-based, mTORi-based, PI3Ki-based; PARPi-based)</li> <li>• CDK4/6i -&gt; ET-based</li> <li>• CDK4/6i + AI/Fulvestrant -&gt; Tamoxifen</li> <li>• CDK4/6i + AI/Fulvestrant -&gt; Olaparib</li> </ul> |



| Reference                                 | Topic                                                                                            | Unique References <sup>a</sup> | Patient Population                                                                                 | Treatment Patterns Discussed                                                                                                                                                                                                                                                                                                                                                                                                                                                                                                                                                                                                               |
|-------------------------------------------|--------------------------------------------------------------------------------------------------|--------------------------------|----------------------------------------------------------------------------------------------------|--------------------------------------------------------------------------------------------------------------------------------------------------------------------------------------------------------------------------------------------------------------------------------------------------------------------------------------------------------------------------------------------------------------------------------------------------------------------------------------------------------------------------------------------------------------------------------------------------------------------------------------------|
| Mavratzas, 2021<br><a href="#">[105]</a>  | Recent potential therapeutic strategies after progression on CDK4/6i                             | 32                             | <ul style="list-style-type: none"> <li>• HR+/HER2- mBC</li> <li>• Progressed on CDK4/6i</li> </ul> | <ul style="list-style-type: none"> <li>• CDK4/6i -&gt; Palbociclib + EVE + EXE</li> <li>• CDK4/6i -&gt; Venetoclax +/- Fulvestrant</li> <li>• Palbociclib -&gt; Abemaciclib +/- ET</li> <li>• CDK4/6i -&gt; continued CDK4/6i</li> <li>• Palbociclib -&gt; CT</li> <li>• CDK4/6i -&gt; Alpelisib + Letrozole/Fulvestrant</li> <li>• Palbociclib + ET -&gt; Palbociclib + different ET</li> <li>• CDK4/6i -&gt; Ribociclib + EVE + EXE</li> <li>• AI +/- CDK4/6i -&gt; Alpelisib + Fulvestrant</li> <li>• CDK4/6i -&gt; Targeted Therapy (CDK4/6i-based, AKTi-based, PI3Ki-based, BCL2i-based)</li> <li>• CDK4/6i -&gt; ET-based</li> </ul> |
| Migliaccio, 2021<br><a href="#">[106]</a> | Recent potential therapeutic strategies after progression on CDK4/6i                             | 28                             | <ul style="list-style-type: none"> <li>• HR+/HER2- mBC</li> <li>• Progressed on CDK4/6i</li> </ul> | <ul style="list-style-type: none"> <li>• Palbociclib -&gt; ET monotherapy</li> <li>• CDK4/6i -&gt; EVE + EXE</li> <li>• CDK4/6i + AI -&gt; Alpelisib + Fulvestrant</li> <li>• Palbociclib + Letrozole -&gt; Palbociclib + Fulvestrant</li> <li>• Palbociclib + Letrozole -&gt; CT + EXE + EVE -&gt; Palbociclib + Fulvestrant</li> <li>• Palbociclib/Ribociclib -&gt; Abemaciclib (+/- ET)</li> <li>• CDK4/6i -&gt; Ribociclib + EVE + EXE</li> <li>• CDK4/6i -&gt; Targeted Therapy (CDK4/6i-based, mTORi-based, PI3Ki-based, AKTi-based)</li> </ul>                                                                                      |
| Nagaraj, 2021<br><a href="#">[107]</a>    | Recent progress in optimizing ET and the development of targeted agents in the management of mBC | 15                             | <ul style="list-style-type: none"> <li>• HR+/HER2- mBC</li> <li>• Progressed on CDK4/6i</li> </ul> | <ul style="list-style-type: none"> <li>• AI +/- CDK4/6i -&gt; Alpelisib + Fulvestrant</li> <li>• CDK4/6i -&gt; Targeted Therapy (CDK4/6i-based, mTORi-based)</li> <li>• CDK4/6i -&gt; ET-based</li> </ul>                                                                                                                                                                                                                                                                                                                                                                                                                                  |
| Xu, 2021 <a href="#">[108]</a>            | Treatment combination strategies to extend the use of CDK4/6i in various tumour types            | 1                              | <ul style="list-style-type: none"> <li>• HR+/HER2- mBC</li> </ul>                                  | <ul style="list-style-type: none"> <li>• ET -&gt; Ribociclib + Fulvestrant</li> </ul>                                                                                                                                                                                                                                                                                                                                                                                                                                                                                                                                                      |
| Cogliati, 2022<br><a href="#">[109]</a>   | Analyze significant results in post-CDK4/6i setting trials                                       | 20                             | <ul style="list-style-type: none"> <li>• HR+/HER2- mBC</li> <li>• Progressed on CDK4/6i</li> </ul> | <ul style="list-style-type: none"> <li>• CDK4/6i -&gt; CT</li> <li>• CDK4/6i -&gt; ET,</li> <li>• CDK4/6i -&gt; EVE + EXE</li> <li>• CDK4/6i -&gt; CDK4/6i</li> <li>• CDK4/6i -&gt; anti-VEGF + CT</li> <li>• CDK4/6i -&gt; PIK3CA inhibitors</li> <li>• CDK4/6i -&gt; BCL-2 inhibitors</li> <li>• CDK4/6i -&gt; Immunotherapy</li> </ul>                                                                                                                                                                                                                                                                                                  |

| Reference           | Topic                                                                | Unique References <sup>a</sup> | Patient Population                                                   | Treatment Patterns Discussed                                                                                                                                                                        |
|---------------------|----------------------------------------------------------------------|--------------------------------|----------------------------------------------------------------------|-----------------------------------------------------------------------------------------------------------------------------------------------------------------------------------------------------|
| Munzone, 2021 [110] | Assessment of benefit of CDK4/6i on PFS2 and on time to chemotherapy | 8                              | <ul style="list-style-type: none"> <li>• HR+HER2- aBC/mBC</li> </ul> | <ul style="list-style-type: none"> <li>• CDK4/6i -&gt; ET</li> <li>• CDK4/6i -&gt; CT</li> <li>• CDK4/6i -&gt; mTORi,</li> <li>• CDK4/6i -&gt; CDK4/6i</li> <li>• CDK4/6i -&gt; Eribulin</li> </ul> |

<sup>a</sup> Included ongoing trials evaluating subsequent treatments after progression on CDK4/6i.

Abbreviations: aBC = advanced breast cancer; AI = aromatase inhibitor; CDK = cyclin dependent kinase; CT = chemotherapy; eBC = early breast cancer; ET = endocrine therapy; EVE = everolimus; EXE = exemestane; HER2 = human epidermal growth factor receptor 2; HR = hormone receptor; mBC = metastatic breast cancer; mPFS = median progression-free survival; mTORi = mammalian target of rapamycin inhibitor; Bcl2i = B-cell lymphoma 2 inhibitor; N = number/sample size; OS = overall survival; PARP = poly adenosine diphosphate-ribose polymerase; PI3K = phosphoinositide 3 kinase; TNBC = triple negative breast cancer; VEGF = vascular endothelial growth factor.

## Online Resource 4: Detailed Characteristics of Clinical Studies

**Table S9: CDK4/6i Clinical Studies: Patient Population and Treatment Characteristics**

| Reference           | Study Design                | Patient Population    | Patient (N) | CDK4/6i LoT | CDK4/6i Regimen Received  | Prior Treatment Received |
|---------------------|-----------------------------|-----------------------|-------------|-------------|---------------------------|--------------------------|
| Agrawal, 2021 [63]  | Retrospective Observational | HR+/HER2- mBC         | 115         | 1L          | Palbociclib + AI          | N/A                      |
|                     |                             |                       | 73          | 2L          | Palbociclib + Fulvestrant | CT <sup>a</sup>          |
| Bardia, 2021b [41]  | Clinical Trial              | HR+/HER2- aBC/mBC     | 95          | 2L+         | EXE + ribociclib + EVE    | CT, ET, CDK4/6i          |
| Basile, 2021 [36]   | Retrospective Observational | HR+/HER2- mBC         | 40          | 2L          | CDK4/6i + ET              | ET                       |
| Battisti, 2019 [86] | Retrospective Observational | HR+/HER2- aBC         | 43          | 1L-3L       | Palbociclib + ET          | CT                       |
|                     |                             |                       | 52          | 1L-3L       | Palbociclib + ET          | ET                       |
|                     |                             |                       | 75          | 4L+         | Palbociclib + ET          | CT                       |
|                     |                             |                       | 66          | 4L+         | Palbociclib + ET          | ET                       |
| Boer, 2021 [61]     | Retrospective Observational | HR+/HER2- aBC         | 399         | 1L+         | Palbociclib + AI          | CT, ET                   |
|                     |                             |                       | 563         | 1L+         | Palbociclib + Fulvestrant | CT, ET                   |
| Brufsky, 2019 [70]  | Retrospective Observational | HR+/HER2- mBC         | 14          | 1L          | Palbociclib + Letrozole   | N/A                      |
|                     |                             |                       | 18          | 2L          | Palbociclib + Letrozole   | CT, ET <sup>a</sup>      |
|                     |                             |                       | 94          | 3L+         | Palbociclib + Letrozole   | CT, ET <sup>a</sup>      |
| Collins, 2021 [91]  | Retrospective Observational | HR+/HER2- mBC, gBRCAm | 36          | 1L          | Palbociclib +/- ET        | N/A                      |

| Reference              | Study Design                            | Patient Population             | Patient (N) | CDK4/6i LoT | CDK4/6i Regimen Received                              | Prior Treatment Received                          |
|------------------------|-----------------------------------------|--------------------------------|-------------|-------------|-------------------------------------------------------|---------------------------------------------------|
|                        |                                         | HR+/HER2- mBC, gBRCAwt         | 293         | 1L          | Palbociclib +/- ET                                    | N/A                                               |
|                        |                                         | HR+/HER2- mBC, gBRCAwt/unknown | 1160        | 1L          | Palbociclib +/- ET                                    | N/A                                               |
|                        |                                         | HR+/HER2- mBC, gBRCAm          | 27          | 2L          | Palbociclib +/- ET                                    | ET <sup>b</sup>                                   |
|                        |                                         | HR+/HER2- mBC, gBRCAwt         | 253         | 2L          | Palbociclib +/- ET                                    | ET <sup>b</sup>                                   |
|                        |                                         | HR+/HER2- mBC, gBRCAwt/unknown | 922         | 2L          | Palbociclib +/- ET                                    | ET <sup>b</sup>                                   |
|                        |                                         | HR+/HER2- mBC, gBRCAm          | 22          | 3L+         | Palbociclib +/- ET                                    | CT, ET, EVE + EXE <sup>c</sup>                    |
|                        |                                         | HR+/HER2- mBC, gBRCAwt         | 228         | 3L+         | Palbociclib +/- ET                                    | CT, ET, EVE + EXE <sup>c</sup>                    |
|                        |                                         | HR+/HER2- mBC, gBRCAwt/unknown | 801         | 3L+         | Palbociclib +/- ET                                    | CT, ET, EVE + EXE <sup>c</sup>                    |
| Cui, 2021 [32]         | Machine Learning Analysis               | HR+/HER2- mBC                  | 3965        | 1L          | CDK4/6i (palbociclib, abemaciclib, ribociclib) +/- ET | N/A                                               |
|                        |                                         |                                | 2455        | 2L          | CDK4/6i (palbociclib, abemaciclib, ribociclib) +/- ET | CT, ET                                            |
| Davie, 2021 [30]       | Prospective Observational               | HR+/HER2- aBC                  | 2259        | 1L+         | CT, ET, CDK4/6i + ET, ET + targeted therapies         | CT, ET, CDK4/6i + ET, ET + targeted therapies     |
| dos Anjos, 2019 [46]   | Retrospective Observational             | ER+ mBC                        | 135         | 2L+         | CDK4/6i                                               | CDK4/6i                                           |
| Eziokwu, 2019 [45]     | Retrospective Observational             | HR+/HER2- mBC                  | 30          | 2L          | CDK4/6i (palbociclib, abemaciclib) + ET               | Palbociclib + letrozole, fulvestrant, or other AI |
| Fountzilas, 2020 [47]  | Prospective-Retrospective Observational | HR+/HER2- aBC/mBC              | 149         | 1L          | Palbociclib or ribociclib                             | N/A                                               |
|                        |                                         |                                | 94          | 2L          | Palbociclib or ribociclib                             | CT, ET                                            |
|                        |                                         |                                | 117         | 3L+         | Palbociclib or ribociclib                             | CT, ET                                            |
| Giridhar, 2019 [58]    | Retrospective Observational             | ER+ mBC                        | 81          | 1L          | Palbociclib + ET                                      | N/A                                               |
|                        |                                         |                                | 55          | 2L          | Palbociclib + ET                                      | NR                                                |
| Goldschmidt, 2018 [35] | Retrospective Observational             | HR+/HER2- mBC                  | 210         | 1L-2L       | CDK4/6i                                               | NR                                                |
| Gong, 2018 [113]       | Retrospective Observational             | HR+/HER2- aBC/mBC              | 100         | 1L+         | Palbociclib + ET                                      | CT, ET                                            |
| Jeong, 2021 [37]       | Retrospective Observational             | HR+/HER2- mBC                  | 33          | 2L+         | Palbociclib or abemaciclib + fulvestrant              | EVE + EXE                                         |
| Kessler, 2020 [89]     | Retrospective Observational             | aBC/mBC                        | 68          | 2L-3L       | CDK4/6i                                               | CT                                                |
|                        |                                         |                                | 20          | 4L+         | CDK4/6i                                               | CT                                                |

| Reference              | Study Design                | Patient Population         | Patient (N) | CDK4/6i LoT | CDK4/6i Regimen Received       | Prior Treatment Received |
|------------------------|-----------------------------|----------------------------|-------------|-------------|--------------------------------|--------------------------|
| Lin, 2021 [71]         | Retrospective Observational | HR+/HER2- aBC/mBC          | 233         | 1L          | Palbociclib + AI               | N/A                      |
|                        |                             |                            | 48          | 1L-2L       | Palbociclib + Fulvestrant      | ET                       |
| Liu, 2020 [64]         | Retrospective Observational | HR+/HER2- mBC              | 42          | 1L          | Palbociclib + ET               | N/A                      |
|                        |                             |                            | 88          | 2L+         | Palbociclib + ET               | CT, ET, EVE <sup>a</sup> |
|                        |                             |                            | 19          | 4L+         | Palbociclib + ET               | CT, ET, EVE <sup>a</sup> |
| Masuda, 2021 [49]      | Clinical Trial              | ER+/HER- aBC               | 32          | 1L+         | Palbociclib + letrozole        | NR                       |
|                        |                             |                            | 27          | 1L+         | Palbociclib + Fulvestrant      | NR                       |
| McLaurin, 2019 [126]   | Retrospective Observational | HR+/HER2- mBC              | 2968        | 1L+         | CDK4/6i                        | NR                       |
| Meegdes, 2021 [31]     | Retrospective Observational | HR+/HER2- aBC              | 214         | 1L          | CDK4/6i + ET                   | N/A                      |
|                        |                             |                            | 71          | 2L          | CDK4/6i + ET                   | NR                       |
| Neven, 2021 [68]       | Clinical Trial              | HR+/HER2- aBC              | 265         | 1L          | Abemaciclib + fulvestrant      | N/A                      |
|                        |                             |                            | 170         | 2L          | Abemaciclib + fulvestrant      | ET                       |
| Palumbo, 2021 [69]     | Retrospective Observational | HR+/HER2- mBC              | 61          | 1L          | Palbociclib + ET               | N/A                      |
|                        |                             |                            | 32          | 1L          | Palbociclib + letrozole        | N/A                      |
|                        |                             |                            | 29          | 1L          | Palbociclib + fulvestrant      | N/A                      |
|                        |                             |                            | 51          | 2L          | Palbociclib + ET               | CT, ET <sup>a, d</sup>   |
|                        |                             |                            | 28          | 2L          | Palbociclib + letrozole        | CT, ET <sup>a, d</sup>   |
|                        |                             |                            | 23          | 2L          | Palbociclib + fulvestrant      | CT, ET <sup>a, d</sup>   |
|                        |                             |                            | 70          | 3L+         | Palbociclib + ET               | CT, ET <sup>a, d</sup>   |
|                        |                             |                            | 30          | 3L+         | Palbociclib + letrozole        | CT, ET <sup>a, d</sup>   |
| Petracci, 2020 [48]    | Prospective Observational   | HR+/HER2- aBC              | 63          | 1L          | Palbociclib + ET               | N/A                      |
|                        |                             |                            | 44          | 2L+         | Palbociclib + ET               | CT, ET <sup>a</sup>      |
| Pizzuti, 2019 [115]    | Retrospective Observational | HR+/HER2- aBC              | 158         | 1L          | Palbociclib + ET               | N/A                      |
|                        |                             |                            | 106         | 2L          | Palbociclib + ET               | CT, ET                   |
|                        |                             |                            | 159         | 3L+         | Palbociclib + ET               | CT, ET                   |
| Rath, 2021 [65]        | Retrospective Observational | HR+/HER2- mBC <sup>e</sup> | 22          | 1L          | Palbociclib or ribociclib + ET | N/A                      |
|                        |                             |                            | 79          | 2L+         | Palbociclib or ribociclib + ET | CT, ET                   |
| Schneeweiss, 2020 [67] | Clinical Trial              | HR+/HER2- aBC              | 864         | 1L          | CDK4/6i + ET                   | N/A                      |
|                        |                             |                            | 512         | 2L          | CDK4/6i + ET                   | CT, ET <sup>f</sup>      |

| Reference                 | Study Design                | Patient Population | Patient (N) | CDK4/6i LoT | CDK4/6i Regimen Received                                    | Prior Treatment Received        |
|---------------------------|-----------------------------|--------------------|-------------|-------------|-------------------------------------------------------------|---------------------------------|
|                           |                             |                    | 188         | 3L          | CDK4/6i + ET                                                | CT, ET <sup>f</sup>             |
| Tamragouri, 2019 [44]     | Retrospective Observational | HR+/HER2- mBC      | 21          | 2L+         | Abemaciclib monotherapy, or in combination with fulvestrant | Palbociclib + AI or fulvestrant |
| Taylor-Stokes, 2019 [116] | Retrospective Observational | HR+/HER2- aBC/mBC  | 106         | 1L          | 1L Palbociclib + Fulvestrant                                | N/A                             |
|                           |                             |                    | 186         | 2L+         | 2L+ Palbociclib + Fulvestrant                               | NR                              |
|                           |                             |                    | 162         | 2L          | 2L Palbociclib + Fulvestrant                                | NR                              |
|                           |                             |                    | 22          | 3L          | 3L Palbociclib + Fulvestrant                                | NR                              |
| Varella, 2019 [72]        | Retrospective Observational | HR+ aBC/mBC        | 57          | 1L          | Palbociclib + letrozole                                     | N/A                             |
|                           |                             |                    | 34          | 1L          | Palbociclib + fulvestrant                                   | N/A                             |
|                           |                             |                    | 39          | 2L          | Palbociclib + fulvestrant                                   | CT <sup>a</sup>                 |
|                           |                             |                    | 31          | 2L          | Palbociclib + letrozole                                     | NR                              |
|                           |                             |                    | 32          | 3L+         | Palbociclib + fulvestrant                                   | CT <sup>a</sup>                 |
|                           |                             |                    | 85          | 3L+         | Palbociclib + letrozole                                     | NR                              |
| Waller, 2019 [117]        | Retrospective Observational | HR+/HER2- aBC/mBC  | 105         | 1-3L        | Palbociclib + letrozole                                     | NR                              |
|                           |                             |                    | 8           | 1L          | 1L Palbociclib + fulvestrant                                | N/A                             |
|                           |                             |                    | 49          | 2L+         | 2L+ Palbociclib + fulvestrant                               | NR                              |
| Wander, 2019 [43]         | Retrospective Observational | HR+/HER2- mBC      | 58          | 2L+         | Abemaciclib +/- ET                                          | Palbociclib                     |
| Wander, 2021 [42]         | Retrospective Observational | HR+/HER2- mBC      | 70          | 2L          | Abemaciclib + antiestrogen                                  | Palbociclib                     |
|                           |                             |                    | 17          | 2L          | Abemaciclib                                                 | Palbociclib                     |
|                           |                             |                    | 87          | 2L          | Abemaciclib +/- antiestrogen                                | Palbociclib                     |
| Xi, 2019 [51]             | Retrospective Observational | mBC                | 42          | 1L          | Palbociclib + HT                                            | N/A                             |
|                           |                             |                    | 50          | 2L          | Palbociclib + HT                                            | NR                              |
|                           |                             |                    | 108         | 3L+         | Palbociclib + HT                                            | NR                              |
| Zhang, 2021 [66]          | Retrospective Observational | HR+/HER2- aBC      | 88          | 1L          | Palbociclib + ET                                            | N/A                             |
|                           |                             |                    | 39          | 2L          | Palbociclib + ET                                            | CT, ET <sup>9</sup>             |
|                           |                             |                    | 24          | 3L          | Palbociclib + ET                                            | CT, ET <sup>9</sup>             |
| Albanell, 2022 [88]       | Clinical Trial              | HR+/HER2- aBC      | 32          | 2L+         | Palbociclib + ET                                            | Palbociclib + ET                |
| Check, 2022 [127]         | Retrospective Observational | HER2-low mBC       | 635         | 1L-2L       | ET/CT/CDK4/6i+ET                                            | ET/CT/CDK4/6i+ET                |
| Choong, 2022 [73]         | Retrospective Observational | HR+/HER2- mBC      | 91          | 1L          | Palbociclib + Letrozole/Fulvestrant                         | NA                              |

| Reference                  | Study Design                            | Patient Population | Patient (N) | CDK4/6i LoT | CDK4/6i Regimen Received                       | Prior Treatment Received |
|----------------------------|-----------------------------------------|--------------------|-------------|-------------|------------------------------------------------|--------------------------|
|                            |                                         |                    | 45          | 2L          | Palbociclib + Letrozole/Fulvestrant            | CT, ET                   |
| Endo, 2022 [74]            | Retrospective Observational             | HR+/HER2- aBC      | 41          | 1L          | CDK4/6i + ET                                   | NA                       |
|                            |                                         |                    | 33          | 2L          | CDK4/6i + ET                                   | CT, ET                   |
| Engler, 2022 [34]          | Prospective Registry                    | HR+/HER2- aBC      | 474         | 1L          | CDK4/6i + Anti-hormone therapy                 | NA                       |
| Gao, 2021 [92]             | Retrospective pooled analysis           | HR+/HER2- aBC/mBC  | 1305        | 1L-2L       | CDK4/6i + Fulvestrant                          | NR                       |
| Gharib, 2022 [76]          | Prospective Retrospective Observational | HR+/HER2- aBC      | 30          | 1L          | Palbociclib + Letrozole                        | NA                       |
|                            |                                         |                    | 30          | 2L+         | Palbociclib + Letrozole                        | NR                       |
| Ha, 2022 [78]              | Retrospective Observational             | HR+/HER2- aBC      | 708         | 1L          | CDK4/6i + AI                                   | NA                       |
|                            |                                         |                    | 380         | 2L          | CDK4/6i + Fulvestrant                          | AI                       |
| Li, 2021 [80]              | Retrospective Observational             | HR+/HER2- aBC      | 54          | 1L          | Palbociclib + Letrozole/Fulvestrant            | NA                       |
|                            |                                         |                    |             | 2L          | Palbociclib + Letrozole/Fulvestrant            | CT, ET                   |
|                            |                                         |                    |             | 3L+         | Palbociclib + Letrozole/Fulvestrant            | CT, ET                   |
| Marineau, 2022 [118]       | Retrospective Observational             | HR+/HER2- mBC      | 65          | 1L-2L+      | Abemaciclib/Palbociclib + ET                   | NR                       |
| Martin, 2022a [90]         | Clinical Trial                          | HR+HER2- mBC       | 601         | 1L-4L+      | Palbociclib + ET                               | NR                       |
| Mo, 2022a [79]             | Retrospective Observational             | HR+/HER2- mBC      | 186         | 1L          | Palbociclib + ET                               | NR                       |
|                            |                                         |                    |             | 2L-3L       | Palbociclib + ET                               | NR                       |
|                            |                                         |                    |             | 4L-5L       | Palbociclib + ET                               | NR                       |
|                            |                                         |                    |             | 6L+         | Palbociclib + ET                               | NR                       |
| Mycock, 2022 [85]          | Retrospective Observational             | HR+/HER2- aBC/mBC  | 170         | 2L+         | Palbociclib + AI/Fulvestrant                   | CT/ET/Targeted           |
| ClinicalTrials.gov [121]   | Retrospective Observational             | HR+/HER2- mBC      | 4320        | 1L+         | CDK4/6i (Palbociclib, Abemaciclib, Ribociclib) | CT, ET, or other         |
| Novick, 2022 [119]         | Retrospective Observational             | HR+/HER2- aBC/mBC  | 22          | 1L          | Palbociclib + Letrozole                        | NR                       |
| Sampedro-Gimeno, 2021 [82] | Retrospective Observational             | aBC/mBC            | 73          | 1L          | Palbociclib + ET                               | NR                       |
|                            |                                         |                    |             | 2L          | Palbociclib + ET                               | NR                       |
| Sawaki, 2022 [33]          | Retrospective Observational             | HR+/HER2- aBC      | 357         | 1L          | 1L Palbociclib + Fulvestrant                   | NA                       |
|                            |                                         |                    |             |             | 1L Palbociclib + Letrozole                     | NA                       |
|                            |                                         |                    |             |             | 1L Palbociclib + Exemestane                    | NA                       |

| Reference                  | Study Design                | Patient Population | Patient (N) | CDK4/6i LoT | CDK4/6i Regimen Received            | Prior Treatment Received        |
|----------------------------|-----------------------------|--------------------|-------------|-------------|-------------------------------------|---------------------------------|
|                            |                             |                    |             |             | 1L Palbociclib + Anastrozole        | NA                              |
|                            |                             |                    |             |             | 1L Palbociclib + Tamoxifen          | NA                              |
|                            |                             |                    |             |             | 1L Palbociclib + Torimifen          | NA                              |
|                            |                             |                    |             |             | 1L Palbociclib + Other              | NA                              |
|                            |                             |                    | 336         | 2L          | 2L Palbociclib + Fulvestrant        | CT, ET                          |
|                            |                             |                    |             |             | 2L Palbociclib + Letrozole          | CT, ET                          |
|                            |                             |                    |             |             | 2L Palbociclib + Exemestane         | CT, ET                          |
|                            |                             |                    |             |             | 2L Palbociclib + Anastrozole        | CT, ET                          |
|                            |                             |                    |             |             | 2L Palbociclib + Tamoxifen          | CT, ET                          |
|                            |                             |                    |             |             | 2L Palbociclib + Torimifen          | CT, ET                          |
|                            |                             |                    |             |             | 2L Palbociclib + Other              | CT, ET                          |
|                            |                             |                    | 150         | 3L          | 3L Palbociclib + Fulvestrant        | CT, ET                          |
|                            |                             |                    |             |             | 3L Palbociclib + Letrozole          | CT, ET                          |
|                            |                             |                    |             |             | 3L Palbociclib + Exemestane         | CT, ET                          |
|                            |                             |                    |             |             | 3L Palbociclib + Anastrozole        | CT, ET                          |
| 3L Palbociclib + Tamoxifen | CT, ET                      |                    |             |             |                                     |                                 |
| 3L Palbociclib + Other     | CT, ET                      |                    |             |             |                                     |                                 |
| Shen, 2022 [83]            | Ambispective Observational  | HR+/HER2- aBC      | 190         | 1L          | Palbociclib + Letrozole/Anastrozole | CT, ET                          |
|                            |                             |                    |             |             | Palbociclib + Exemestane            | CT, ET                          |
|                            |                             |                    |             |             | Palbociclib + Fulvestrant           | CT, ET                          |
|                            |                             |                    |             | 2L          | Palbociclib + Letrozole/Anastrozole | CT, ET                          |
|                            |                             |                    |             |             | Palbociclib + Exemestane            | CT, ET                          |
|                            |                             |                    |             |             | Palbociclib + Fulvestrant           | CT, ET                          |
|                            |                             |                    |             | 3L          | Palbociclib + Letrozole/Anastrozole | CT, ET                          |
|                            |                             |                    |             |             | Palbociclib + Exemestane            | CT, ET                          |
|                            |                             |                    |             |             | Palbociclib + Fulvestrant           | CT, ET                          |
| Smyth, 2022 [120]          | Retrospective Observational | HR+/HER2- mBC      | 115         | 2L          | Abemaciclib-based                   | Palbociclib or Ribociclib-based |
| Whitaker, 2022 [40]        | Retrospective Observational | HR+/HER2- mBC      | 2,408       | 2L          | CDK4/6i                             | CDK4/6i/ET/CT                   |

| Reference           | Study Design                | Patient Population | Patient (N) | CDK4/6i LoT | CDK4/6i Regimen Received            | Prior Treatment Received |
|---------------------|-----------------------------|--------------------|-------------|-------------|-------------------------------------|--------------------------|
| Yildirim, 2022 [84] | Retrospective Observational | HR+/HER2- mBC      | 12          | 1L          | CDK4/6i + GnRH + fulvestrant/AI     | NA                       |
|                     |                             |                    | 13          | 2L+         | CDK4/6i + GnRH + fulvestrant/AI     | NR                       |
| Zhang, 2022 [29]    | Clinical Trial              | HR+/HER2+ mBC      | 7           | 1L          | Dalpiciclib + pyrotinib + letrozole | CT/ET/Targeted           |
|                     |                             |                    | 8           | 2L          | Dalpiciclib + pyrotinib + letrozole | CT/ET/Targeted           |
| Zhong, 2022 [39]    | Retrospective Observational | HR+/HER2- aBC      | 34          | 1L          | Palbociclib + ET                    | CT/ET                    |
|                     |                             |                    | 14          | 2L          | Palbociclib + ET                    | CT/ET                    |
|                     |                             |                    | 15          | 3L+         | Palbociclib + ET                    | CT/ET                    |

<sup>a</sup> Study only reported % of patients who received this prior treatment. Prior treatment received for remaining patients were not reported.

<sup>b</sup> Top agents included letrozole, anastrozole, fulvestrant, tamoxifen.

<sup>c</sup> Top agents included fulvestrant, EVE + EXE, letrozole, capecitabine, anastrozole, and paclitaxel.

<sup>d</sup> CT included taxane, capecitabine, vinorelbine, eribulin, and other; ET included AI, EVE, and fulvestrant.

<sup>e</sup> ER+ and/or PR+.

<sup>f</sup> ET included fulvestrant-based, tamoxifen-based, or AI monotherapy; CT type not reported.

<sup>g</sup> CT included anthracyclines, taxanes, anthracyclines + taxanes, fluorouracil + adriamycin + cyclophosphamide, capecitabine/fluorouracil/thiotepa/cisplatin + vinorelbine; ET included SERMs, AI, SERMs followed by AI.

Abbreviations: #L = # of lines of therapy; aBC = advanced breast cancer; AI = aromatase inhibitor; CDK4/6i = cyclin-dependent kinase 4/6 inhibitor; CT = chemotherapy; ET = endocrine therapy; EVE = everolimus; EXE = exemestane; HER2 = human epidermal growth factor receptor 2; HR = hormone receptor; LOT = line of therapy; mBC = metastatic breast cancer; N = sample size; N/A = not applicable; NR = not reported; OS = overall survival.

**Table S10: CDK4/6i Clinical Studies: Treatment Patterns**

| Reference             | Patient Population                                     | Patient (N) | Treatment Sequence       | Number of Patients Receiving Sequence (%) | Median OS (months) | Median PFS (months) |
|-----------------------|--------------------------------------------------------|-------------|--------------------------|-------------------------------------------|--------------------|---------------------|
| Basile 2021 [36]      | HR+/HER2- luminal mBC; received first and second lines | 717         | ET + CDK4/6i -> ET       | 19 (2.65%)                                | Not reached        | NR                  |
|                       |                                                        |             | ET + CDK4/6i -> CT       | 29 (4.04%)                                | 20.35              | NR                  |
|                       |                                                        |             | ET -> ET + CDK4/6i       | 40 (5.58%)                                | 61.38              | NR                  |
|                       |                                                        |             | ET -> ET or CT           | 254 (35.43%)                              | 24.49              | NR                  |
|                       |                                                        |             | CT -> ET or CT           | 194 (27.06%)                              | 23.57              | NR                  |
|                       |                                                        |             | No therapy               | 51 (7.11%)                                | N/A                | N/A                 |
|                       |                                                        |             | Missing                  | 130 (18.13%)                              | N/A                | N/A                 |
| Goldschmidt 2018 [35] | HR+/HER2- mBC; postmenopausal female;                  | 147         | CDK4/6i + AI -> EVE + AI | 13 (8.8%)                                 | NR                 | NR                  |
|                       |                                                        |             | CDK4/6i + AI -> CT       | 13 (8.8%)                                 |                    |                     |



| Reference       | Patient Population                                                           | Patient (N) | Treatment Sequence                | Number of Patients Receiving Sequence (%) | Median OS (months) | Median PFS (months) |
|-----------------|------------------------------------------------------------------------------|-------------|-----------------------------------|-------------------------------------------|--------------------|---------------------|
|                 | at least two lines of therapy                                                |             | CDK4/6i + AI -> Fulvestrant       | 8 (5.4%)                                  |                    |                     |
|                 |                                                                              |             | CDK4/6i + fulvestrant -> EVE + AI | 4 (2.7%)                                  |                    |                     |
|                 |                                                                              |             | AI -> CDK4/6i + fulvestrant       | 20 (13.6%)                                |                    |                     |
|                 |                                                                              |             | AI -> Fulvestrant                 | 7 (4.8%)                                  |                    |                     |
|                 |                                                                              |             | AI -> CDK4/6i + AI                | 5 (3.4%)                                  |                    |                     |
|                 |                                                                              |             | CT -> CDK4/6i + AI                | 15 (10.3%)                                |                    |                     |
|                 |                                                                              |             | CT -> CT                          | 9 (6.3%)                                  |                    |                     |
|                 |                                                                              |             | CT -> CDK4/6i + fulvestrant       | 6 (4.2%)                                  |                    |                     |
|                 |                                                                              |             | CT -> fulvestrant                 | 3 (2.0%)                                  |                    |                     |
|                 |                                                                              |             | CT -> AI                          | 3 (2.0%)                                  |                    |                     |
|                 |                                                                              |             | Fulvestrant -> CDK4/6i + AI       | 4 (2.7%)                                  |                    |                     |
|                 |                                                                              |             | EVE + AI -> CDK4/6i + fulvestrant | 5 (3.4%)                                  |                    |                     |
|                 |                                                                              |             | Fulvestrant -> CT                 | 5 (3.4%)                                  |                    |                     |
|                 |                                                                              |             | NR                                | 27 (18.4%)                                |                    |                     |
| Jeong 2021 [37] | HR+/HER2- mBC; treated with both CDK4/6i-based and everolimus-based regimens | 88          | CDK4/6i -> EVE + EXE              | 51 (58% <sup>a</sup> )                    | 46.8               | 24.8                |
|                 |                                                                              |             | EVE + EXE -> CDK4/6i              | 37 (42% <sup>a</sup> )                    | 38.9               | 21.8                |

<sup>a</sup> Percentage was calculated based on reported sample size.

Abbreviations: AI = aromatase inhibitor; CDK4/6i = cyclin-dependent kinase 4/6 inhibitor; CT = chemotherapy; ET = endocrine therapy; EVE = everolimus; EXE = exemestane; HR = hormone receptor; HER2 = human epidermal growth factor receptor 2; mBC = metastatic breast cancer; N/A = not applicable; NR = not reported.

**Table S11: CDK4/6i Clinical Studies: Prognostic Factors Associated with Reported Outcomes**

| Reference          | Patient Population                        | Patient (N) | CDK4/6i Regimen                 | Outcome         | Associated Prognostic Factor                                              |
|--------------------|-------------------------------------------|-------------|---------------------------------|-----------------|---------------------------------------------------------------------------|
| Agrawal, 2021 [63] | HR+/HER2- mBC; received prior palbociclib | 188         | Palbociclib + AI or fulvestrant | 3-year PFS rate | Line of HT                                                                |
|                    |                                           |             |                                 |                 | Disease stage at presentation                                             |
|                    |                                           |             |                                 |                 | Prior chemotherapy before Palbociclib in the neoadjuvant/adjuvant setting |
| Basile, 2021 [36]  |                                           | 717         | CT, ET alone, ET + CDK4/6i      | PFS             | ET naive                                                                  |
|                    |                                           |             |                                 | PFS             | De novo metastatic disease                                                |

| Reference           | Patient Population                                                        | Patient (N) | CDK4/6i Regimen                        | Outcome                                                           | Associated Prognostic Factor                                                |
|---------------------|---------------------------------------------------------------------------|-------------|----------------------------------------|-------------------------------------------------------------------|-----------------------------------------------------------------------------|
|                     | HR+/HER2- luminal mBC; received first and second lines                    |             |                                        | PFS, OS                                                           | Metastatic sites: Bone only vs. no visceral vs. visceral                    |
|                     |                                                                           |             |                                        | PFS, OS                                                           | Number of metastatic sites and lesions                                      |
|                     |                                                                           |             |                                        | PFS, OS                                                           | ECOG PS                                                                     |
|                     |                                                                           |             |                                        | PFS, OS                                                           | First-line therapy choice (ET + CDK4/6i vs. ET alone vs. CT)                |
|                     |                                                                           |             |                                        | OS                                                                | Treatment strategy (presented in Table S10)                                 |
|                     |                                                                           |             |                                        | OS                                                                | Ki-67 on primary tumor (<14% vs. ≥ 14%)                                     |
| Battisti, 2019 [86] | HR+/HER2- aBC; commenced palbociclib within program between 2015-Sep 2017 | 118         | Palbociclib                            | Median PFS, 6-month PFS rate, median OS, 18-month OS rate         | Metastatic sites: Bone only vs. non-bone only                               |
|                     |                                                                           |             |                                        | Median PFS, OS, 18-month OS rate                                  | Metastatic sites: Visceral only vs. non-visceral only                       |
|                     |                                                                           |             |                                        | Median OS, 18-month OS rate                                       | Prior lines of CT                                                           |
| Kessler, 2020 [89]  | mBC or unresectable aBC                                                   | 88          | CDK4/6i                                | PFS, OS                                                           | Prior lines of CT for mBC                                                   |
| Liu, 2020 [64]      | HR+/HER2- mBC; female                                                     | 130         | Palbociclib                            | Tumor response                                                    | Number of metastatic sites                                                  |
|                     |                                                                           |             |                                        | Tumor response                                                    | Prior CT for mBC (yes vs. no)                                               |
|                     |                                                                           |             |                                        | Tumor response                                                    | Sensitivity to prior ET                                                     |
|                     |                                                                           |             |                                        | Tumor response                                                    | Line of palbociclib therapy                                                 |
|                     |                                                                           |             |                                        | DCR                                                               | ET choice to palbociclib                                                    |
| Norman, 2021 [114]  | HR+/HER2- aBC; female                                                     | 247         | CDK4/6i with or without bone radiation | Absolute neutrophil count prior to palbociclib                    | With or without bone radiation prior to CDK4/6i                             |
|                     |                                                                           |             |                                        | Absolute lymphocyte count prior to palbociclib and during cycle 1 | With or without bone radiation prior to CDK4/6i                             |
|                     |                                                                           |             |                                        | Lymphopenia grade                                                 | With or without bone radiation prior to CDK4/6i                             |
|                     |                                                                           |             |                                        | Platelets prior to palbociclib                                    | With or without bone radiation prior to CDK4/6i                             |
| Palumbo, 2021 [69]  | HR+/HER2- mBC; pre- and postmenopausal women                              | 182         | Palbociclib + letrozole                | PFS                                                               | Disease-free interval from adjuvant treatment (≤ 24 months vs. > 24 months) |
|                     |                                                                           |             |                                        | PFS, OS                                                           | Visceral involvement (yes vs. no)                                           |
|                     |                                                                           |             |                                        | PFS, OS                                                           | Line of palbociclib therapy                                                 |
| Pizzuti, 2019 [115] | HR+/HER2- aBC/mBC                                                         | 423         | Palbociclib                            | 1-year PFS rate, 1-year OS rate                                   | Line of palbociclib therapy                                                 |
|                     |                                                                           |             |                                        | 1-year PFS rate                                                   | Visceral involvement (yes vs. no)                                           |

| Reference          | Patient Population                                                                        | Patient (N) | CDK4/6i Regimen                                 | Outcome                                                         | Associated Prognostic Factor                                    |
|--------------------|-------------------------------------------------------------------------------------------|-------------|-------------------------------------------------|-----------------------------------------------------------------|-----------------------------------------------------------------|
|                    |                                                                                           |             |                                                 | 1-year PFS rate, 1-year OS rate                                 | EVE pretreatment (yes vs. no)                                   |
| Princic, 2019 [38] | HR+/HER2- mBC; postmenopausal female; after progression on a CDK4/6i-based treatment line | 525         | Mixed treatment (EVE, CDK4/6i, ET alone, or CT) | Subsequent systemic therapy type following a CDK4/6i-based line | Age                                                             |
|                    |                                                                                           |             |                                                 |                                                                 | Recurrent and with ET prior to metastasis diagnosis vs. de novo |
|                    |                                                                                           |             |                                                 |                                                                 | Metastatic sites: Bone only vs. visceral                        |
|                    |                                                                                           |             |                                                 |                                                                 | Prior CDK4/6i duration (> 6 vs. ≤ 6 months)                     |
|                    |                                                                                           |             |                                                 |                                                                 | Prior CDK4/6i treatment partner (AI vs. fulvestrant)            |
|                    |                                                                                           |             |                                                 |                                                                 | Baseline BC-related costs                                       |
|                    |                                                                                           |             |                                                 |                                                                 | Prior CT (yes vs. no)                                           |
| Rath, 2021 [65]    | ER and/or PR+/HER2- mBC                                                                   | 101         | CDK4/6i                                         | PFS, OS                                                         | ECOG PS at CDK4/6i initiation                                   |
|                    |                                                                                           |             |                                                 | PFS, OS                                                         | Dose reduction type                                             |
|                    |                                                                                           |             |                                                 | PFS, OS                                                         | CDK4/6i partner drug choice                                     |
|                    |                                                                                           |             |                                                 | PFS, OS                                                         | Number of prior line of therapy                                 |
|                    |                                                                                           |             |                                                 | PFS, OS                                                         | Previous lines of HT                                            |
|                    |                                                                                           |             |                                                 | PFS                                                             | Previous lines of CT                                            |
|                    |                                                                                           |             |                                                 | PFS                                                             | Metastatic sites: Bone only vs. visceral                        |
|                    |                                                                                           |             |                                                 | PFS, OS                                                         | Prior CT (yes vs. no)                                           |
| Wander, 2021 [42]  | HR+ mBC; received prior palbociclib                                                       | 87          | Abemaciclib +/- antiestrogen agents             | PFS                                                             | Sequence of CDK4/6i (palbociclib followed by abemaciclib)       |
| Zhang, 2021 [66]   | Women with HR+/HER2- aBC                                                                  | 151         | Palbociclib + ET                                | PFS                                                             | ECOG PS                                                         |
|                    |                                                                                           |             |                                                 |                                                                 | Disease-free survival (≤ 24 months vs. > 24 months)             |
|                    |                                                                                           |             |                                                 |                                                                 | Line of palbociclib therapy                                     |
|                    |                                                                                           |             |                                                 |                                                                 | Sensitivity to prior ET                                         |
|                    |                                                                                           |             |                                                 |                                                                 | Initial palbociclib dose (125 mg vs. 100 mg)                    |
| Gharib, 2022 [76]  | Women with previously treated or untreated HR+/HER2- BC                                   | 60          | Palbociclib + Letrozole                         | Response to Palbociclib + Letrozole                             | Age                                                             |
|                    |                                                                                           |             |                                                 |                                                                 | Liver metastases                                                |
|                    |                                                                                           |             |                                                 |                                                                 | Response at initial evaluation                                  |
|                    |                                                                                           |             |                                                 |                                                                 | Best response                                                   |
| Li, 2021 [80]      | HR+/HER2- aBC who received at least one cycle of palbociclib                              | 54          | Palbociclib + ET                                | Palbociclib sensitivity                                         | Ki67 in metastatic tumours                                      |
|                    |                                                                                           |             |                                                 |                                                                 | Progesterone in metastatic tumours                              |
|                    |                                                                                           | 1210        |                                                 | rwPFS                                                           | Continuation of CDK4/6i                                         |

| Reference                                   | Patient Population                                                                          | Patient (N) | CDK4/6i Regimen                                               | Outcome                        | Associated Prognostic Factor                      |
|---------------------------------------------|---------------------------------------------------------------------------------------------|-------------|---------------------------------------------------------------|--------------------------------|---------------------------------------------------|
| Martin, 2022b [87]                          | HR+/HER2- mBC who received CDK4/6i in first line                                            |             | CT, ET, everolimus, alpelisib, PARPi, clinical trial, CDK4/6i | rwOS                           | Continuation of CDK4/6i                           |
|                                             |                                                                                             |             |                                                               |                                | Subsequent Everolimus                             |
| Sampedro-Gimeno, 2021 [82]                  | Patients with mBC or aBC previously treated with Palbociclib + ET                           | 73          | Palbociclib + ET                                              | PFS                            | Performance status                                |
| Whitaker, 2022 [40]                         | HR+/HER2- mBC                                                                               | 2,408       | CDK4/6i                                                       | OS                             | CDK4/6i in 1L                                     |
| Yildirim, 2022 [84]                         | Men with HR+/HER2- mBC treated with any CDK4/6i                                             | 25          | CDK4/6i + GnRH + fulvestrant/AI                               | PFS                            | Line of treatment                                 |
|                                             |                                                                                             |             |                                                               |                                | Presence of liver metastases                      |
| Zhong, 2022 [39]                            | HR+HER2- aBC                                                                                | 64          | Palbociclib + ET                                              | Survival benefit               | No prior chemotherapy                             |
|                                             |                                                                                             |             |                                                               |                                | 1 or less lines of prior ET                       |
|                                             |                                                                                             |             |                                                               |                                | No primary resistance to ET                       |
|                                             |                                                                                             |             |                                                               |                                | Fewer visceral metastases sites                   |
|                                             |                                                                                             |             |                                                               |                                | No liver metastasis                               |
|                                             |                                                                                             |             |                                                               |                                | Received Palbociclib 1L or 2L                     |
|                                             |                                                                                             |             |                                                               |                                | Ki67 level (independent)                          |
|                                             |                                                                                             |             |                                                               |                                | Molecular typing (independent)                    |
|                                             |                                                                                             |             |                                                               |                                | Sensitivity to ET (independent)                   |
| Number of visceral metastases (independent) |                                                                                             |             |                                                               |                                |                                                   |
| Line of Palbociclib + ET (independent)      |                                                                                             |             |                                                               |                                |                                                   |
| Zhou, 2022 [96]                             | HR+/HER2- breast cancer patients treated with tucidinostat and progression on prior CDK4/6i | 44          | Tucidinostat post-CDK4/6i                                     | Benefit from Tucidinostat + ET | 1 metastatic site                                 |
|                                             |                                                                                             |             |                                                               |                                | Sequential tucidinostat after CDK4/6i progression |

Abbreviations: AI = aromatase inhibitor; BC = breast cancer; CDK4/6i = cyclin-dependent kinase 4/6 inhibitor; CT = chemotherapy; DCR = disease control rate; ECOG PS = Eastern Cooperative Oncology Group Performance Status; ET = endocrine therapy; EVE = everolimus; HER2 = human epidermal growth factor receptor 2; HR = hormone receptor; HT = hormone therapy; mBC = metastatic breast cancer; mOS = median overall survival; mPFS = median progression-free survival; OS = overall survival; PFS = progression-free survival.

**Table S12: Post-CDK4/6i Clinical Studies: Patient Population and Treatment Characteristics**

| Reference             | Study Design                                  | Patient Population   | Patient (N) | Subsequent LoT | Subsequent Therapy Composition |
|-----------------------|-----------------------------------------------|----------------------|-------------|----------------|--------------------------------|
| Bardia, 2021a [93]    | Phase I clinical trial                        | ER+/HER2- aBC or mBC | 26          | 2L+            | Elacestrant (ET)               |
| Bardia, 2021b [41]    | Phase I/II clinical trial (TRINITY-1)         | HR+/HER2- aBC/mBC    | 96          | 2L+            | EXE + Ribociclib + EVE         |
| Basile, 2021 [36]     | Retrospective observational study             | HR+/HER2- mBC        | 29          | 2L             | CT                             |
|                       |                                               |                      | 19          | 2L             | ET                             |
| Boer, 2021 [61]       | Retrospective observational study             | aBC                  | 962         | 2L+            | CT, ET                         |
| Brufsky, 2019 [70]    | Retrospective observational study             | HR+/HER2- aBC/mBC    | 126         | 2L+            | CT, ET, CT + ET                |
| Cook, 2021 [94]       | Retrospective observational study             | HR+ mBC              | 17          | 2L+            | EVE + EXE                      |
| Dhokal, 2020 [95]     | Retrospective observational study             | HR+/HER2- mBC        | 41          | 2L+            | EVE                            |
| Dos Anjos, 2019 [46]  | Retrospective observational study             | ER+/HER2- mBC        | 135         | 3L+            | ET, CDK4/6i + ET               |
| Dudek, 2020 [55]      | Phase I clinical trial                        | ER+ mBC              | 15          | 3L+            | TTC-352 (ET)                   |
| Eziokwu, 2019 [45]    | Retrospective observational study             | HR+/HER2- mBC        | 30          | 2L+            | CDK4/6i + ET                   |
| Fountzilas, 2020 [47] | Retrospective/prospective observational study | HR+/HER2- aBC/mBC    | 149         | 2L             | CT, ET, CDK4/6i + ET           |
| Giridhar, 2019 [58]   | Retrospective observational study             | ER+ mBC              | 37          | 2L             | CT, ET, EVE + EXE              |
|                       |                                               |                      | 24          | 3L             | CT, ET, EVE + EXE              |
| Jeong, 2021 [37]      | Retrospective observational study             | HR+/HER2- mBC        | 51          | 2L+            | EVE + EXE                      |
| Li, 2021 [99]         | Retrospective observational study             | HR+/HER2- mBC        | 200         | 2L+            | CT, ET                         |
| Liu, 2020 [64]        | Retrospective observational study             | HR+/HER2- mBC        | 37          | 2L+            | CT                             |
|                       |                                               |                      | 19          | 2L+            | ET                             |
| Masuda, 2021 [49]     | Phase III clinical trial (PALOMA-2)           | ER+/HER2- aBC        | 46          | 2L-3L          | CT, ET, investigational drug   |
|                       | Phase III clinical trial (PALOMA-3)           | HR+/HER2- aBC        | 35          | 2L-3L          | CT, ET, investigational drug   |
| Mougalian, 2019 [54]  | Retrospective observational study             | HR+/HER2- mBC        | 121         | 2L             | Eribulin (CT)                  |
|                       |                                               |                      | 111         | 3L             | Eribulin (CT)                  |
|                       |                                               |                      | 28          | ≥4L            | Eribulin (CT)                  |

| Reference                | Study Design                             | Patient Population | Patient (N) | Subsequent LoT | Subsequent Therapy Composition                |
|--------------------------|------------------------------------------|--------------------|-------------|----------------|-----------------------------------------------|
| Petracci, 2020 [48]      | Prospective observational study (RENATA) | HR+/HER2- aBC      | 50          | 2L+            | CT, ET, palliative care, investigational drug |
| Princic, 2019 [38]       | Retrospective observational study        | HR+/HER2- mBC      | 208         | 2L             | CT, ET, CDK4/6i-based, EVE-based              |
|                          |                                          |                    | 317         | 3L-5L          | CT, ET, CDK4/6i-based, EVE-based              |
| Rath, 2021 [65]          | Retrospective observational study        | HR+/HER2- mBC      | 77          | 2L+            | CT, ET, CT + ET, best supportive care         |
| Rossi, 2019 [59]         | Phase II clinical trial (TREnd)          | HR+/HER2- mBC      | 105         | 3L+            | CT, ET, targeted therapy                      |
| Rozenblit, 2021 [100]    | Retrospective observational study        | HR+/HER2- mBC      | 273         | 2L             | EVE + EXE                                     |
|                          |                                          |                    | 245         | 3L             | EVE + EXE                                     |
| Tamragouri, 2019 [44]    | Retrospective observational study        | HR+/HER2- mBC      | 21          | 2L+            | Abemaciclib                                   |
| Wander, 2019 [43]        | Retrospective observational study        | HR+/HER2- mBC      | 58          | 2L+            | Abemaciclib                                   |
| Wander, 2021 [42]        | Retrospective observational study        | HR+/HER2- mBC      | 87          | 2L+            | Abemaciclib                                   |
| Xi, 2019 [51]            | Retrospective observational study        | HR+/HER2- mBC      | 7           | 2L             | CT                                            |
|                          |                                          |                    | 14          | 3L             | CT                                            |
|                          |                                          |                    | 49          | 4L+            | CT                                            |
|                          |                                          |                    | 7           | 2L             | ET, ET + targeted agents                      |
|                          |                                          |                    | 9           | 3L             | ET, ET + targeted agents                      |
|                          |                                          |                    | 16          | 4L+            | ET, ET + targeted agents                      |
| Bidard, 2022 [52]        | Phase III Clinical Trial (EMERALD)       | ER+/HER2- aBC      | 239         | 2L/3L          | Elacestrant (ET)                              |
|                          |                                          |                    | 238         | 2L/3L          | Standard of Care (ET)                         |
| Garcia-Saenz, 2022 [111] | Phase II Clinical Trial                  | ER+/HER2- aBC/mBC  | 16          | 2L+            | Fulvestrant + Sapanisertib 30mg               |
|                          |                                          |                    | 16          | 2L+            | Fulvestrant + Sapanisertib 4mg                |
| Gousis, 2022 [77]        | Retrospective observational study        | ER+/HER2- mBC      | 22          | 2L             | CT                                            |
|                          |                                          |                    | 12          | 2L             | ET                                            |
| Hayama, 2022 [57]        | Retrospective observational study        | HR+/HER2- aBC/mBC  | 34          | 2L-5L+         | Everolimus + Exemestane                       |
|                          |                                          |                    | 20          | 2L-5L+         | ET                                            |
|                          |                                          |                    | 32          | 2L-5L+         | CT                                            |
| Kitano, 2022 [53]        | Retrospective observational study        | HR+/HER2- mBC      | 13          | NR             | Everolimus                                    |
| Lim, 2022 [97]           | Phase Ib/II Clinical Trial               | HR+/HER2-          | 25          | NR             | Letrozole + Lenvatinib                        |

| Reference                | Study Design                      | Patient Population            | Patient (N) | Subsequent LoT | Subsequent Therapy Composition         |
|--------------------------|-----------------------------------|-------------------------------|-------------|----------------|----------------------------------------|
| Marschner, 2022 [81]     | Prospective Registry              | HR+/HER2- aBC                 | 113         | 2L             | CT, ET, CDK4/6i, PARPi                 |
| Martin, 2022b [87]       | Retrospective observational study | HR+/HER2- mBC                 | 23          | 2L             | AI-based therapy                       |
|                          |                                   |                               | 302         | 2L             | CDK4/6i-based therapy                  |
|                          |                                   |                               | 249         | 2L             | Chemotherapy                           |
|                          |                                   |                               | 84          | 2L             | Fulvestrant-based therapy              |
|                          |                                   |                               | 99          | 2L             | mTORi                                  |
|                          |                                   |                               | 82          | 2L             | Other (targeted, clinical trial, etc.) |
| Mo, 2022b [98]           | Retrospective observational study | HR+/HER2- invasive BC         | 79          | 2L-5L+         | Everolimus + Exemestane                |
| ClinicalTrials.gov [123] | Retrospective observational study | HR+/HER2- aBC/mBC             | 150         | 2L+            | CDK4/6i + Fulvestrant or ET            |
| ClinicalTrials.gov [122] | Retrospective observational study | HR+/HER2- aBC/mBC             | 847         | 2L+            | Mixed treatment                        |
| Parola, 2022 [128]       | Retrospective observational study | HR+/HER2- locally advanced BC | 59          | 1L+            | ET                                     |
| Seki, 2022 [56]          | Retrospective observational study | ER+/HER2- mBC                 | 37          | 2L+            | CT                                     |
| Zhong, 2022 [39]         | Retrospective observational study | HR/HER2- aBC                  | 10          | 2L-3L+         | CT                                     |
|                          |                                   |                               | 4           | 2L-3L+         | ET                                     |
| Zhou, 2022 [96]          | Retrospective observational study | HR+/HER2- mBC                 | 44          | 2L or 3L       | Tucidinostat                           |
|                          |                                   |                               |             | 4L+            | Tucidinostat                           |

Abbreviations: #L = # of lines of therapy; aBC = advanced breast cancer; AI = aromatase inhibitor; CDK4/6i = cyclin-dependent kinase 4/6 inhibitor; CT = chemotherapy; ET = endocrine therapy; EVE = evrolimus; EXE = exemestane; HER2 = human epidermal growth factor receptor 2; HR = hormone receptor; LOT = line of therapy; mBC = metastatic breast cancer; N = sample size; N/A = not applicable; NR = not reported; OS = overall survival.

## Online Resource 5: Ongoing Clinical Studies of Post-CDK4/6i Treatments

**Table S13: Ongoing Clinical Studies of Post-CDK4/6i Treatments**

| Study Name            | NCT #       | Country                 | Study Design/<br>Phase             | Patient Population                                                     | Interventions                                                                                   | Comparator  |
|-----------------------|-------------|-------------------------|------------------------------------|------------------------------------------------------------------------|-------------------------------------------------------------------------------------------------|-------------|
| <i>Phase I – I/II</i> |             |                         |                                    |                                                                        |                                                                                                 |             |
| N/A                   | NCT04247126 | US                      | Single-arm Open-label, Phase I     | HR+/HER2- aBC/mBC with progression on CDK4/6i + ET                     | SY-5609 + fulvestrant                                                                           | N/A         |
| N/A                   | NCT04134884 | US                      | Single-arm Open-label, Phase I     | HR+/HER2- TNBC/mBC with progression on CDK4/6i (subgroup of trial)     | ASTX727 + talazoparib                                                                           | N/A         |
| TAKTIC                | NCT03959891 | US                      | Non-randomized Open-label, Phase I | HR+/HER2- aBC/mBC with progression on CDK4/6i + ET                     | lpatasertib + fulvestrant<br>lpatasertib + letrozole<br>lpatasertib + palbociclib + fulvestrant | N/A         |
| ASPIRE                | NCT03854903 | US                      | Single-arm Open-label, Phase I     | HR+/HER2- aBC/mBC with progression on CDK4/6i + AI                     | Palbociclib + bosutinib + fulvestrant                                                           | N/A         |
| N/A                   | NCT04606446 | US, Japan               | Non-randomized Open-label, Phase I | ER+/HER2- aBC/mBC with progression on CDK4/6i + ET                     | PF-07248144<br>PF-07248144 + fulvestrant<br>PF-07248144 + letrozole + palbociclib               | N/A         |
| N/A                   | NCT02779751 | Global                  | Non-randomized Open-label, Phase I | HR+/HER2- aBC/mBC                                                      | Pembrolizumab + abemaciclib<br>Pembrolizumab + abemaciclib + anastrozole                        | N/A         |
| N/A                   | NCT03519178 | Global                  | Single-arm Open-label, Phase I/II  | HR+/HER2- aBC/mBC with progression on CDK4/6i + ET (subgroup of trial) | PF-06873600 + ET                                                                                | N/A         |
| N/A                   | NCT03363893 | US, UK                  | Randomized Open-label, Phase I/II  | HR+/HER2- aBC/mBC with progression on CDK4/6i + AI (subgroup of trial) | CT7001 + fulvestrant                                                                            | Placebo     |
| MORPHEUS HR + BC      | NCT03280563 | US, South Korea, Israel | Randomized Open-label, Phase Ib/II | HR+/HER2- mBC                                                          | Atezolizumab + entinostat<br>Atezolizumab + fulvestrant                                         | Fulvestrant |



| Study Name      | NCT #       | Country   | Study Design/<br>Phase               | Patient Population                                                     | Interventions                            | Comparator            |
|-----------------|-------------|-----------|--------------------------------------|------------------------------------------------------------------------|------------------------------------------|-----------------------|
|                 |             |           |                                      |                                                                        | Atezolizumab + ipatasertib               |                       |
|                 |             |           |                                      |                                                                        | Atezolizumab + ipatasertib + fulvestrant |                       |
|                 |             |           |                                      |                                                                        | Atezolizumab + bevacizumab + ET          |                       |
|                 |             |           |                                      |                                                                        | Atezolizumab + abemaciclib + fulvestrant |                       |
| N/A             | NCT05181033 | Singapore | Phase Ib/II trial                    | ER+/HER2- mBC who progressed on 1L CDK4/6i + ET                        | Lenvatinib+Letrozole                     | Fulvestrant           |
| N/A             | NCT05586841 | China     | Phase Ib trial                       | HR+HER2- aBC after failure of CDK4/6i                                  | Dalpiciclib + Chidamide                  | N/A                   |
| N/A             | NCT05251714 | USA       | Non-randomized dose confirming trial | ER+ HER2- advanced BC after disease progression on prior CDK4/6i + ET  | CFI-402257                               | N/A                   |
| <b>Phase II</b> |             |           |                                      |                                                                        |                                          |                       |
| PACE            | NCT03147287 | US        | Randomized Open-Label, Phase II      | HR+/HER2- mBC with progression on CDK4/6i + ET                         | Palbociclib + fulvestrant                | Fulvestrant           |
|                 |             |           |                                      |                                                                        | Palbociclib + fulvestrant + avelumab     |                       |
| BYLieve         | NCT03056755 | Global    | Non-randomized Open-label, Phase II  | HR+/HER2- aBC                                                          | Alpelisib + fulvestrant                  | N/A                   |
|                 |             |           |                                      |                                                                        | Alpelisib + letrozole                    |                       |
| N/A             | NCT04318223 | Italy     | Single-arm Open-label, Phase II      | HR+/HER2- aBC/mBC with progression on CDK4/6i + AI/tamoxifen +/- LHRHa | Palbociclib + fulvestrant                | N/A                   |
| SMILE           | NCT04738292 | US        | Single-arm Open-label, Phase II      | HR+/HER2- aBC/mBC with progression on CDK4/6i + AI                     | Onapristone + fulvestrant                | N/A                   |
| TATEN           | NCT04251169 | Spain     | Single-arm Open-label, Phase II      | HR+/HER2- aBC/mBC with progression on CDK4/6i                          | Pembrolizumab + paclitaxel               | N/A                   |
| MAINTAIN        | NCT02632045 | US        | Randomized Double-blind, Phase II    | HR+/HER2- mBC with progression on CDK4/6i + AI                         | Ribociclib + fulvestrant                 | Placebo + fulvestrant |
| N/A             | NCT04553133 | US        | Single-arm Open-label, Phase II      | HR+/HER2- aBC/mBC with progression on CDK4/6i + ET (subgroup of trial) | PF-07104091 + palbociclib + fulvestrant  | N/A                   |
| N/A             | NCT02738866 | US        | Single-arm Open-label, Phase II      | HR+/HER2- aBC/mBC with progression on palbociclib + AI                 | Palbociclib + fulvestrant                | N/A                   |

| Study Name        | NCT #                   | Country                      | Study Design/<br>Phase                   | Patient Population                                                                                                                                                                   | Interventions                    | Comparator                                                                    |
|-------------------|-------------------------|------------------------------|------------------------------------------|--------------------------------------------------------------------------------------------------------------------------------------------------------------------------------------|----------------------------------|-------------------------------------------------------------------------------|
| CAPTURE           | ACTRN12619<br>001117101 | Australia,<br>New<br>Zealand | Randomized Open-<br>label, Phase II      | ER+/HER2- aBC/mBC with<br>progression on CDK4/6i +<br>AI                                                                                                                             | Alpelisib + fulvestrant          | Capecitabine                                                                  |
| N/A               | NCT05411380             | China                        | Phase II Single-<br>arm                  | HR+/HER2- post-<br>menopausal mBC after<br>failure on CDK4/6i                                                                                                                        | Tucidinostat                     | N/A                                                                           |
| N/A               | NCT05536128             | Korea                        | Phase II Single-<br>arm                  | HR+/HER2- mBC or<br>inoperable BC with<br>progression after CDK4/6i<br>or ET                                                                                                         | Fulvestrant + Olaparib           | N/A                                                                           |
| N/A               | NCT05079360             | USA                          | Phase II Single-<br>arm                  | ER+ HER2- MBC after<br>disease progression on<br>CDK4/6i + NSAI +<br>Fulvestrant                                                                                                     | Sabizabulin                      | Active Control                                                                |
| N/A               | NCT05594095             | China                        | Phase II<br>Randomized trial             | Patients with HR+ HER2-<br>aBC who have previously<br>used CDK4/6i                                                                                                                   | Mixed treatment post-<br>CDK4/6i | N/A                                                                           |
| N/A               | NCT05159778             | USA                          | Phase II Single-<br>arm                  | Patients with ER/PR+/<br>HER2- mBC who have<br>progressed through prior<br>hormone therapy with at<br>least one CDK4/6i, and a<br>maximum of 2 subsequent<br>chemotherapy treatments | Imprime PGG +<br>Pembrolizumab   | N/A                                                                           |
| SEQUEL-<br>BREAST | NCT05392608             | Netherlands                  | Phase II Single-<br>arm                  | HR+ HER2- aBC with<br>PIK3CA mutated tumors,<br>with progressive disease on<br>fulvestrant and previous<br>treatment with CDK4/6i in<br>1L or 2L                                     | Alpelisib                        | N/A                                                                           |
| <b>Phase III</b>  |                         |                              |                                          |                                                                                                                                                                                      |                                  |                                                                               |
| SOLAR-1           | NCT02437318             | Global                       | Randomized<br>Double-blind,<br>Phase III | HR+/HER2- aBC with<br>progression on AI<br>(subgroup with prior<br>progression on CDK4/6i)                                                                                           | Alpelisib + fulvestrant          | Placebo + fulvestrant                                                         |
| EMERALD           | NCT03778931             | Global                       | Randomized Open-<br>label, Phase III     | ER+/HER2- aBC/mBC with<br>progression on CDK4/6i +<br>ET/AI                                                                                                                          | Elacestrant                      | Standard of care:<br>fulvestrant,<br>anastrozole, letrozole,<br>or exemestane |
| FINER             | NCT04650581             | Canada                       | Randomized<br>Double-blind,<br>Phase III | ER+/HER2- aBC with<br>progression on CDK4/6i +<br>AI                                                                                                                                 | Ipatasertib + fulvestrant        | Placebo + fulvestrant                                                         |

| Study Name           | NCT #       | Country             | Study Design/<br>Phase                                 | Patient Population                                                                                        | Interventions                                             | Comparator                                                                           |
|----------------------|-------------|---------------------|--------------------------------------------------------|-----------------------------------------------------------------------------------------------------------|-----------------------------------------------------------|--------------------------------------------------------------------------------------|
| TROPiCS-02           | NCT03901339 | Global              | Randomized Open-label, Phase III                       | HR+/HER2- mBC with progression on CDK4/6i                                                                 | Sacituzumab govitecan                                     | Treatment of physician's choice: eribulin, capecitabine, gemcitabine, or vinorelbine |
| SONIA                | NCT03425838 | Netherlands         | Randomized Open-label, Phase III                       | HR+/HER2- aBC                                                                                             | 1L CDK4/6i + AI (letrozole/anastrozole) -> 2L Fulvestrant | 1L AI letrozole/anastrozole -> CDK4/6i + fulvestrant                                 |
| evERA                | NCT05306340 | USA                 | Randomized Open-label, Phase III                       | Patients with ER+/HER2- local aBC or mBC who have had previous treatment with CDK4/6is and ET             | Giredestrant + Everolimus                                 | Exemestane + Everolimus                                                              |
| postMONARCH          | NCT05169567 | Global              | Randomized, double-blind, placebo-controlled Phase III | Patients with HR+/HER2- BC that progressed or recurred after previous CDK4/6i + ET                        | Abemaciclib + Fulvestrant                                 | Placebo + Fulvestrant                                                                |
| VIKTORIA-1           | NCT05501886 | Global              | Randomized Open-label, Phase III                       | HR+ HER2- aBC previously treated with CDK4/6i + NSAI                                                      | Gedatolisib + Fulvestrant + Palbociclib                   | Gedatolisib + Fulvestrant                                                            |
| <b>Observational</b> |             |                     |                                                        |                                                                                                           |                                                           |                                                                                      |
| PROSPERITY           | NCT04943497 | Russia              | Prospective observational                              | HR+/HER2- aBC/mBC and initiated treatment with ribociclib, alpelisib, ET or combination therapy           | Non-interventional                                        | N/A                                                                                  |
| Treasure             | NCT04916509 | Qatar               | Retrospective observational                            | HR+/HER2- aBC/mBC and initiated treatment with palbociclib                                                | Non-interventional                                        | N/A                                                                                  |
| PRECIOUS             | NCT04937660 | Africa, Middle East | Prospective observational                              | HR+/HER2- aBC/mBC                                                                                         | Non-interventional                                        | N/A                                                                                  |
| N/A                  | NCT04460911 | US                  | Retrospective observational                            | HR+/HER2- mBC and receiving palbociclib + fulvestrant or fulvestrant monotherapy                          | Non-interventional                                        | N/A                                                                                  |
| SIRI                 | NCT04654208 | Sweden              | Retrospective observational                            | HR+/HER2- mBC and at least one filled prescription of palbociclib in the Swedish Prescribed Drug Register | Non-interventional                                        | N/A                                                                                  |
| HERMIONE-13          | NCT05173103 | Italy               | Retrospective observational                            | HR+/HER2- aBC treated in second line after failure of CDK4/6i + AI/Fulvestrant                            | Non-interventional                                        | N/A                                                                                  |

| Study Name | NCT #       | Country     | Study Design/<br>Phase      | Patient Population                                                                                                                            | Interventions      | Comparator |
|------------|-------------|-------------|-----------------------------|-----------------------------------------------------------------------------------------------------------------------------------------------|--------------------|------------|
| N/A        | NCT05276713 | China       | Retrospective observational | HR+ mBC previously treated with CDK4/6i                                                                                                       | Non-interventional | N/A        |
| N/A        | NCT05153187 | Japan       | Retrospective observational | Japanese patients with HR+/HER2- BC initiating palbociclib                                                                                    | Non-interventional | N/A        |
| N/A        | NCT05505175 | Brazil      | Retrospective observational | Adult female patients with HR+/HER2 non-metastatic breast cancer who progressed to locally aBC/mBC receiving palbociclib combination regimens | Non-interventional | N/A        |
| N/A        | NCT05452798 | Denmark     | Retrospective observational | Patients with HR+/HER2- locally advanced or metastatic breast cancer treated with palbociclib                                                 | Non-interventional | N/A        |
| N/A        | NCT05399329 | Japan       | Retrospective observational | Japanese patients with HR+/HER2- aBC who have received palbociclib + ET in 1L or 2L                                                           | Non-interventional | N/A        |
| N/A        | NCT05132101 | South Korea | Retrospective observational | BC patients who were prescribed with palbociclib in combination with AI for at least 1 cycle                                                  | Non-interventional | N/A        |
| EUCHARIS   | NCT05043506 | Europe      | Retrospective observational | Patients with HR+/HER2- aBC who initiated 1L treatment with palbociclib + AI or AI monotherapy                                                | Non-interventional | N/A        |

Abbreviations: aBC = advanced breast cancer; AI = aromatase inhibitor; BC = breast cancer; CDK4/6i = cyclin-dependent kinase 4/6 inhibitor; ER = estrogen receptor; ET = endocrine therapy; EU = Europe; EVE = everolimus; EXE = exemestane; FDG-PET = fluorodeoxyglucose positron emission tomography; FES-PET = fluoroestradiol positron emission tomography; HR = hormone receptor; HER2 = human epidermal growth factor receptor 2; mBC = metastatic breast cancer; N/A = not applicable; RCT = randomized controlled trial; UK = United Kingdom; US = United States.
